# Supplementary material for: Investigating the use of ultrasonography for the antenatal diagnosis of structural congenital anomalies in low-income and middle-income countries: systematic review protocol
Source: PubMed Central journal article supplement (PMC6782034; doi:10.1136/bmjpo-2019-000538), 2019-09-13
Supplement: bmjpo-2019-000538.draft_revisions.pdf [file bmjpo-2019-000538.draft_revisions.pdf]

# BMJ Paediatrics Open

BMJ Paediatrics Open is committed to open peer review. As part of this commitment we make the peer review history of every article we publish publicly available.

When an article is published we post the peer reviewers' comments and the authors' responses online. We also post the versions of the paper that were used during peer review. These are the versions that the peer review comments apply to.

The versions of the paper that follow are the versions that were submitted during the peer review process. They are not the versions of record or the final published versions. They should not be cited or distributed as the published version of this manuscript.

BMJ Paediatrics Open is an open access journal and the full, final, typeset and author-corrected version of record of the manuscript is available on our site with no access controls, subscription charges or pay-per-view fees (<http://bmjpaedsopen.bmj.com>).

If you have any questions on BMJ Paediatrics Open's open peer review process please email [info.bmjpo@bmj.com](mailto:info.bmjpo@bmj.com)

# BMJ Paediatrics Open

## Investigating the Use of Ultrasonography for the Antenatal Diagnosis of Structural Congenital Anomalies in Low- and Middle-Income Countries: A Systematic Review Protocol

|                               |                                                                                                                                                                                                                                                                                                                                  |
|-------------------------------|----------------------------------------------------------------------------------------------------------------------------------------------------------------------------------------------------------------------------------------------------------------------------------------------------------------------------------|
| Journal:                      | <i>BMJ Paediatrics Open</i>                                                                                                                                                                                                                                                                                                      |
| Manuscript ID                 | bmjpo-2019-000538                                                                                                                                                                                                                                                                                                                |
| Article Type:                 | Protocol                                                                                                                                                                                                                                                                                                                         |
| Date Submitted by the Author: | 24-Jun-2019                                                                                                                                                                                                                                                                                                                      |
| Complete List of Authors:     | Goley, Stephanie; King's College London, Department of Global Health & Social Medicine<br>Sakula-Barry, Sidonie; World Cancer Research Fund<br>Kelly, Ann; King's College London, Department of Global Health & Social Medicine<br>Wright, Naomi; King's College London, King's Centre for Global Health and Health Partnerships |
| Keywords:                     | Congenital Abnorm, Paediatric Surgery, Neonatology, Imaging                                                                                                                                                                                                                                                                      |
|                               |                                                                                                                                                                                                                                                                                                                                  |

SCHOLARONE™  
Manuscripts

# Investigating the Use of Ultrasonography for the Antenatal Diagnosis of Structural Congenital Anomalies in Low- and Middle-Income Countries: A Systematic Review Protocol

Stephanie Goley<sup>1</sup>, Sidonie Sakula-Barry<sup>2</sup>, Ann Kelly<sup>1</sup>, Naomi Wright<sup>3</sup>

June 2019

PROSPERO Registration: CRD42019105620

Registered on February 14, 2019

Prepared according to Prisma-P Guidelines

<sup>1</sup>Department of Global Health & Social Medicine, King's College London, London, UK

<sup>2</sup>World Cancer Research Fund UK, London, UK

<sup>3</sup>King's Centre for Global Health and Health Partnerships, School of Population Health and Environmental Sciences, King's College London, London, UK

## Author Email Addresses:

info@stephgoley.com

sidonie.sakula-barry1@alumni.lshtm.ac.uk

ann.kelly@kcl.ac.uk

paedsurg.research@gmail.com

## Corresponding Author:

Stephanie Goley, BA MSc

Department of Global Health & Social Medicine, King's College London, London, UK

Correspondence to: Centre for Global Health and Health Partnerships, Suite 2.13 Weston Education Centre, Cutcombe Road, London, SE5 9RJ

Telephone: +1 (815) 830-5360

**What is known?**

- 97% of deaths from congenital anomalies occur in developing countries. Many of these deaths could be prevented with early diagnosis and intervention.
- Ultrasound machines are widely accessible and commonplace in HICs, but a number of factors limit the accessibility and effectiveness of ultrasound in LMICs.

**What will this study add?**

- To systematically investigate, for the first time, the availability and effectiveness of antenatal ultrasound in LMICs in order to elucidate disparities in congenital anomaly detection.
- To evaluate the effects of antenatal ultrasound on the morbidity and mortality rates of neonates with a structural congenital anomaly in LMICs.

**ABSTRACT**

**Introduction:** Congenital anomalies are the 5th leading cause of under-5 mortality globally. The greatest burden is faced by those in developing countries, where over 95% of deaths occur. Many of these deaths may have been preventable through antenatal diagnosis and early intervention. This study aims to conduct a systematic review that investigates the use of antenatal ultrasound to diagnose congenital anomalies and improve the health outcomes of infants in low- and middle-income countries (LMICs).

**Methods and Analysis:** A systematic literature review will be conducted using three search strings: 1) structural congenital anomalies; 2) LMICs; and 3) antenatal diagnosis. Four electronic databases will be searched: MEDLINE, EMBASE, PubMed, and the Cochrane Library. Title, abstract and full text screening will be undertaken in duplicate by two reviewers independently using Covidence. Consensus will be sought from the wider authorship for discrepancies. Data extraction will be undertaken by the principal investigator. The primary analysis will focus on the availability and effectiveness of antenatal ultrasound for structural congenital anomalies. Secondary outcomes will include neonatal morbidity and mortality, termination rates, and referral rates for further antenatal care. Descriptive statistics and a narrative synthesis will be included in the final report. Methodological quality of the included studies will be evaluated using the Cochrane-approved ROBINS-I and RoB 2.0 tools.

**Ethics and Dissemination:** Ethical approval is not required for conducting the systematic review as there will be no direct collection of data from individuals. The results will be submitted for publication in a scientific journal and presented internationally.

**Conclusion:** This is the first study, to our knowledge, to systematically review current literature on the use of antenatal ultrasound for the detection of congenital anomalies in LMICs. This is vital to define current practice, highlight global disparities and evaluate effects on health outcomes for infants in low-resource settings.

## INTRODUCTION

Congenital anomalies represent 9% of the global burden of surgical disease and are one of the leading causes of infant morbidity and mortality globally [1-4]. The burden of congenital anomalies is much greater in low- and middle-income countries (LMICs), comprising over 95% of deaths from these conditions [5, 6]. According to a report by the WHO, every year approximately 303,000 infants die within 4 weeks of birth due to congenital anomalies [7]. However, this is likely an underestimation, as statistics are undoubtedly skewed from underreporting, a lack of congenital anomaly registries, and unreliable medical records in many LMICs.

Structural congenital anomalies are physical deformities that occur during intrauterine development [7]. These anomalies include, but are not limited to, gastro-intestinal malformations, cleft lip and palate, heart defects, musculoskeletal anomalies, and neural tube defects [8]. If detected early and provided appropriate surgical intervention following birth, many structural congenital anomalies can be corrected avoiding preventable death or disability [7].

Advancements in ultrasound technology have allowed for early detection of structural congenital anomalies, which allows mothers and physicians to plan for an appropriate place of delivery and surgical intervention after birth [9]. In many cases, this can result in a significantly reduced risk of morbidity and mortality [10]. While ultrasound machines are widely accessible and commonplace in high-income countries, a number of factors limit the access and effectiveness of antenatal ultrasound in LMICs.

This study aims to systematically investigate, for the first time, the availability and effectiveness of antenatal ultrasound in the diagnosis of structural congenital anomalies in LMICs. Furthermore it aims to evaluate the effects of antenatal ultrasound on mortality and morbidity for neonates with a structural congenital anomaly in LMICs. Such information is vital to help clarify the existing disparities in antenatal ultrasound provision and the potential benefits for improved health outcomes through the delivery of this service in low-resource settings.

## METHODS

PRISMA-P guidelines will be followed in conducting this systematic review [11, 12] (Supplementary File 1). If there are amendments to the protocol, they will be reported in the publication of the results.

### Aim

To conduct a systematic review that investigates the use of antenatal ultrasound to diagnose congenital anomalies and improve the health outcomes of infants in low- and middle-income countries.

## Objectives

1. To systematically catalog studies that focus on the antenatal diagnosis of structural congenital anomalies in LMICs.
2. To evaluate the utilization and effectiveness of ultrasound machines in the antenatal diagnosis of structural congenital anomalies and to report the current practices and policies regarding congenital anomaly detection in LMICs.
3. To evaluate the effects of antenatal ultrasound on the morbidity and mortality rates of neonates with a structural congenital anomaly in LMICs.
4. To critique the methodological quality of the included articles.

## Patient and Public Involvement

Given that this is a systematic literature review, there will be no patient or public involvement. However, all findings will be appropriately disseminated to the public.

## Search Strategy

A search will be conducted using three search strings (Table 1). Search string 1 will encompass structural congenital anomalies. Search string 2 will focus on the setting - LMICs. Finally, search string 3 will look at the antenatal diagnosis of structural congenital anomalies, particularly focusing on the use of ultrasound machines for detection. Boolean operators 'and' and 'or' will be utilized within the search to combine the search terms.

*Table 1: Search Strings*

| Search String 1                                                                                                                                                                                                                                                                                                               | Search String 2                                                                                                                                                                                                                                                                                                                                                                                                                                                                                                                                                                                                               | Search String 3                                                                                                                                                                  |
|-------------------------------------------------------------------------------------------------------------------------------------------------------------------------------------------------------------------------------------------------------------------------------------------------------------------------------|-------------------------------------------------------------------------------------------------------------------------------------------------------------------------------------------------------------------------------------------------------------------------------------------------------------------------------------------------------------------------------------------------------------------------------------------------------------------------------------------------------------------------------------------------------------------------------------------------------------------------------|----------------------------------------------------------------------------------------------------------------------------------------------------------------------------------|
| Congenital Anomalies, Congenital Abnormalities, Congenital Malformation, Fetal Malformation, Birth Defects, Anencephaly, Conjoined Twins, Congenital Heart Defects, Anorectal Malformations, Anal Stenosis, Anal Atresia, Imperforate Anus, Biliary Atresia, Choledochal Cyst, Diaphragmatic Eventration, Esophageal Atresia, | LMICs, Low- and Middle-Income Countries, Developing Countries, Low-Resource Settings, Underdeveloped Countries, Low-Income Countries, Middle-Income Countries, Limited Resource Settings, Africa South of the Sahara, Sub-Saharan Africa, Less Resourced Communities, Afghanistan, Albania, Algeria, American Samoa, Angola, Argentina, Armenia, Azerbaijan, Bangladesh, Belarus, Belize, Benin, Bhutan, Bolivia, Bosnia and Herzegovina, Botswana, Brazil, Bulgaria, Burkina Faso, Burundi, Cabo Verde, Cambodia, Cameroon, Central African Republic, Chad, China, Colombia, Comoros, Democratic Republic of the Congo, DRC, | Antenatal Diagnosis, Prenatal Diagnosis, Antenatal Screening, Prenatal Screening, Antenatal Ultrasound, Prenatal Ultrasound, Antenatal Ultrasonography, Prenatal Ultrasonography |

|                                                                                                                                                                                                                                                                                                                                                                                                                                                                                                                                                                                                                                                                                                                                                                                                                       |                                                                                                                                                                                                                                                                                                                                                                                                                                                                                                                                                                                                                                                                                                                                                                                                                                                                                                                                                                                                                                                                                                                                                                                                                                                                                                                                                                                                                                                                                                            |  |
|-----------------------------------------------------------------------------------------------------------------------------------------------------------------------------------------------------------------------------------------------------------------------------------------------------------------------------------------------------------------------------------------------------------------------------------------------------------------------------------------------------------------------------------------------------------------------------------------------------------------------------------------------------------------------------------------------------------------------------------------------------------------------------------------------------------------------|------------------------------------------------------------------------------------------------------------------------------------------------------------------------------------------------------------------------------------------------------------------------------------------------------------------------------------------------------------------------------------------------------------------------------------------------------------------------------------------------------------------------------------------------------------------------------------------------------------------------------------------------------------------------------------------------------------------------------------------------------------------------------------------------------------------------------------------------------------------------------------------------------------------------------------------------------------------------------------------------------------------------------------------------------------------------------------------------------------------------------------------------------------------------------------------------------------------------------------------------------------------------------------------------------------------------------------------------------------------------------------------------------------------------------------------------------------------------------------------------------------|--|
| <p>Tracheoesophageal<br/>Fistula, Intestinal Atresia,<br/>Duodenal Obstruction,<br/>Duodenal Atresia,<br/>Colonic Atresia,<br/>Malrotation, Apple Peel<br/>Syndrome, Congenital<br/>Diaphragmatic Hernias,<br/>Gastroschisis, Abdominal<br/>Wall Defects,<br/>Exomphalos,<br/>Omphalocele,<br/>Congenital Limb<br/>Deformities, Neural Tube<br/>Defects, Bronchogenic<br/>Cyst, Bronchopulmonary<br/>Sequestration,<br/>Congenital Cystic<br/>Adenomatoid<br/>Malformation of Lung,<br/>Renal Anomalies, Genito-<br/>urinary Anomalies,<br/>Maxillofacial<br/>Abnormalities, Mouth<br/>Abnormalities, Umbilical<br/>Hernia, Hirschsprung<br/>Disease, Ganglionic<br/>Megacolon,<br/>Rectosigmoid<br/>Aganglioneosis, Colonic<br/>Aganglioneosis, Intestinal<br/>Aganglioneosis, Volvulus,<br/>Intestinal Volvulus</p> | <p>Republic of the Congo, Costa Rica, Cote<br/>d'Ivoire, Ivory Coast, Croatia, Cuba,<br/>Djibouti, Dominica, Dominican Republic,<br/>Ecuador, Egypt, El Salvador, Equatorial<br/>Guinea, Eritrea, Ethiopia, Fiji, Gabon,<br/>Gambia, Georgia, Ghana, Grenada,<br/>Guatemala, Guinea, Guinea-Bissau,<br/>Guyana, Haiti, Honduras, India,<br/>Indonesia, Islamic Republic of Iran, Iraq,<br/>Jamaica, Jordan, Kazakhstan, Kenya,<br/>Kiribati, Democratic People's Republic of<br/>Korea, Kosovo, Kyrgyz Republic, Lao PDR,<br/>Laos, Lebanon, Lesotho, Liberia, Libya,<br/>Macedonia Republic, Madagascar,<br/>Malawi, Malaysia, Maldives, Mali,<br/>Marshall Islands, Mauritania, Mauritius,<br/>Mexico, Micronesia, Moldova, Mongolia,<br/>Montenegro, Morocco, Mozambique,<br/>Myanmar, Namibia, Nauru, Nepal,<br/>Nicaragua, Niger, Nigeria, Pakistan,<br/>Panama, Papua New Guinea, Paraguay,<br/>Peru, Philippines, Romania, Russian<br/>Federation, Rwanda, Samoa, Sao Tome<br/>and Principe, Senegal, Serbia, Sierra<br/>Leone, Solomon Islands, Somalia,<br/>Somaliland, South Africa, South Sudan,<br/>Sri Lanka, Saint Lucia, Saint Vincent and<br/>the Grenadines, Sudan, Suriname,<br/>Swaziland, Syrian Arab Republic, Syria,<br/>Tajikistan, Tanzania, Thailand, Timor-<br/>Leste, East Timor, Togo, Tonga, Tunisia,<br/>Turkey, Turkmenistan, Tuvalu, Uganda,<br/>Ukraine, Uzbekistan, Vanuatu,<br/>Venezuela, Vietnam, West Bank and<br/>Gaza, Republic of Yemen, Zambia,<br/>Zimbabwe</p> |  |
|-----------------------------------------------------------------------------------------------------------------------------------------------------------------------------------------------------------------------------------------------------------------------------------------------------------------------------------------------------------------------------------------------------------------------------------------------------------------------------------------------------------------------------------------------------------------------------------------------------------------------------------------------------------------------------------------------------------------------------------------------------------------------------------------------------------------------|------------------------------------------------------------------------------------------------------------------------------------------------------------------------------------------------------------------------------------------------------------------------------------------------------------------------------------------------------------------------------------------------------------------------------------------------------------------------------------------------------------------------------------------------------------------------------------------------------------------------------------------------------------------------------------------------------------------------------------------------------------------------------------------------------------------------------------------------------------------------------------------------------------------------------------------------------------------------------------------------------------------------------------------------------------------------------------------------------------------------------------------------------------------------------------------------------------------------------------------------------------------------------------------------------------------------------------------------------------------------------------------------------------------------------------------------------------------------------------------------------------|--|

A further search will be conducted on the WHO website in order to get a more robust understanding of current programs and policies in place for antenatal ultrasound. Researchers will search the following terms in the WHO Reproductive Health Library: ultrasound, ultrasonography, congenital anomalies, congenital abnormalities, congenital anomaly, congenital abnormality, birth defect, antenatal detection, prenatal detection, antenatal diagnosis, and prenatal diagnosis. These terms were chosen based on an initial screening

1  
2  
3 performed by the researchers which suggested that these terms provided optimum sensitivity  
4 for procuring all relevant WHO literature for this review.  
5

### 6 7 **Published Literature Search**

8  
9 Using the Ovid program, an electronic database search will be conducted on MEDLINE,  
10 EMBASE, Pubmed, and the Cochrane Library using the aforementioned search strategy. These  
11 searches will be filtered to only include studies with human subjects that are written in English.  
12 An example of the search in MEDLINE can be found in Supplementary File 2.  
13  
14

### 15 16 **Inclusion/Exclusion Criteria**

17  
18 Only infants with a structural congenital anomaly as listed in search string 1 will be included.  
19 Studies focusing on non-structural congenital anomalies will be excluded. Furthermore, all  
20 studies must focus on participants from LMICs; research focusing on high-income countries  
21 (HICs) will be excluded. Finally, studies that concentrate on antenatal diagnosis will be included,  
22 while studies focusing on postnatal diagnosis will be excluded.  
23  
24

### 25 26 **Study Design**

27  
28 No filters were applied to study types; thus, all forms of evidence-based research will be  
29 included.  
30

### 31 32 **Methodological Quality**

33  
34 To assess the methodological quality of the studies, the researchers will use the Cochrane Risk  
35 of Bias for Non-Randomized Studies of Intervention (ROBINS-I) and the revised tool to assess  
36 Risk of Bias in randomized trials (RoB 2.0) [13, 14]. These tools are widely used for critically  
37 appraising study methodology. For the purposes of this study, these tools will be used as a  
38 means of quality assessment, rather than as an inclusion/exclusion determinant. Two  
39 independent reviewers will score the articles according to the ROBINS-I and RoB 2.0 criteria and  
40 any discrepancies will be assessed by the research team until unanimity is reached.  
41  
42

### 43 44 **Study Screening**

45  
46 References from the search results will be added to EndNote X8 and duplicates will be  
47 removed. The articles will then be uploaded to Covidence for the screening process. Two  
48 reviewers will screen the titles and abstracts in duplicate, removing any articles that do not  
49 meet the inclusion criteria. The remaining articles will be assessed by two reviewers  
50 independently in full-text and any remaining articles that do not adhere to the study criteria will  
51 be removed.  
52  
53

### 54 55 **Data Extraction**



1  
2  
3 Data extraction will be undertaken by the principal investigator. The following data will be  
4 extracted: place of study, study type, publication status, study population, patient cohort,  
5 gestational age at time of diagnosis, type of anomaly, type of ultrasound, percent receiving  
6 antenatal ultrasound, percent with any anomaly detected, percent with accurate antenatal  
7 diagnosis, training of ultrasound technician, referral rate for further antenatal care, referral rate  
8 to a tertiary pediatric surgery center, termination rate, mortality rate and complications as per  
9 the Clavien-Dindo classification. The following data will be collected regarding antenatal  
10 ultrasound policies: date, country/region, governing body, population coverage, intervention(s)  
11 and outcomes as detailed above.  
12  
13  
14

### 15 **Data Synthesis**

16  
17  
18 Descriptive statistics and narrative synthesis will be utilized. Data will be presented according to  
19 the following categories: effectiveness of antenatal ultrasound, percent of women receiving  
20 antenatal ultrasound, training of personnel performing ultrasound examination, and morbidity  
21 and mortality outcomes.  
22  
23

24 Based on the authors' experience, it is unlikely that a meta-analysis will be feasible due to  
25 limited availability of data. However, if there is appropriate data, a meta-analysis will be  
26 undertaken in duplicate by two independent authors and discrepancies resolved amongst the  
27 wider authorship. Appropriate data will be defined as: two or more sufficiently homogeneous  
28 studies comparing morbidity and/ or mortality between one group who has received antenatal  
29 ultrasound and another who has not. In addition, a meta-analysis may be undertaken if two or  
30 more studies have compared an intervention to improve antenatal ultrasound coverage in a  
31 population or detection rates. Meta-analysis will be undertaken in Stata and results presented  
32 using a forest plot. If there are over 10 studies in the meta-analysis a funnel plot will be  
33 undertaken to assess publication bias and a Galbraith plot to investigate heterogeneity in effect  
34 sizes. The quality of evidence will be assessed following GRADE guidelines.  
35  
36  
37  
38  
39

## 40 **DISCUSSION**

41  
42 The discrepancy in mortality due to congenital anomalies between HICs and LMICs is quite  
43 substantial. For instance, the survival rate for infants with gastroschisis in HICs is above 95%,  
44 while in many LMICs, there are few survivors of the condition [10]. This study aims to  
45 investigate the use of antenatal ultrasound to diagnose congenital anomalies in LMICs. Further,  
46 this study will examine the current policies and programs in place for antenatal ultrasound.  
47 Gaining a better understanding of the current policies and practices which increase the  
48 antenatal diagnosis of structural congenital anomalies may help to determine the most  
49 effective standards of practice. Increasing the early diagnosis of structural congenital anomalies  
50 may help to reduce the morbidity and mortality rates of congenital anomalies in LMICs. Many  
51 complications that arise from certain structural congenital anomalies could be avoided if the  
52 condition is detected antenatally and steps are taken to ensure safe delivery, such as planning  
53  
54  
55  
56  
57  
58  
59  
60

1  
2  
3 the birth at a tertiary healthcare facility. This study may provide crucial information regarding  
4 the effects of antenatal ultrasound on morbidity and mortality rates from congenital anomalies  
5 in LMICs. This in turn can inform future studies aimed at improving availability and quality of  
6 antenatal ultrasound in LMICs to ultimately improve the health outcomes of infants born with  
7 these conditions.  
8  
9

## 10 11 12 **ETHICS AND DISSEMINATION** 13

14 The researchers of this study will be conducting a secondary analysis. No new data will be  
15 collected and there will be no direct interaction with participants. Therefore, it is not necessary  
16 to acquire ethical approval prior to conducting this review. Following data collection and  
17 analysis, the results will be submitted to a peer-reviewed scientific journal for publication. The  
18 results will also be shared in conferences pertaining to infant health, global health and global  
19 surgery.  
20  
21  
22  
23  
24  
25  
26  
27  
28  
29  
30  
31  
32  
33  
34  
35  
36  
37  
38  
39  
40  
41  
42  
43  
44  
45  
46  
47  
48  
49  
50  
51  
52  
53  
54  
55  
56  
57  
58  
59  
60

## References

1. Apfeld, J.C., et al., *Infant, maternal, and geographic factors influencing gastroschisis related mortality in Zimbabwe*. *Surgery*, 2015. **158**(6): p. 1475-80.
2. Sitkin, N.A., et al., *Congenital anomalies in low- and middle-income countries: the unborn child of global surgery*. *World J Surg*, 2015. **39**(1): p. 36-40.
3. Collaborators, G.B.D.C.M., *Global, regional, national, and selected subnational levels of stillbirths, neonatal, infant, and under-5 mortality, 1980-2015: a systematic analysis for the Global Burden of Disease Study 2015*. *Lancet*, 2016. **388**(10053): p. 1725-1774.
4. Wu, V.K., D. Poenaru, and M.J. Poley, *Burden of surgical congenital anomalies in Kenya: a population-based study*. *J Trop Pediatr*, 2013. **59**(3): p. 195-202.
5. Ford, K., et al., *Gastroschisis: Bellwether for neonatal surgery capacity in low resource settings?* *J Pediatr Surg*, 2016. **51**(8): p. 1262-7.
6. Mashuda, F., et al., *Pattern and factors associated with congenital anomalies among young infants admitted at Bugando medical centre, Mwanza, Tanzania*. *BMC Res Notes*, 2014. **7**: p. 195.
7. *Congenital Anomalies*. 2016; Available from:  
<http://www.who.int/mediacentre/factsheets/fs370/en/>.
8. *What are the types of birth defects?* 2017; Available from:  
<https://www.nichd.nih.gov/health/topics/birthdefects/conditioninfo/types>.

- 1  
2  
3 9. Payne, N.R., et al., *Predicting the Outcome of Newborns with Gastroschisis*. Journal of  
4  
5 pediatric surgery, 2009. **44**(5): p. 918-923.  
6  
7
- 8 10. Badrinath, R., et al., *Outcomes and unmet need for neonatal surgery in a resource-*  
9  
10 *limited environment: estimates of global health disparities from Kampala, Uganda*. J  
11  
12 *Pediatr Surg*, 2014. **49**(12): p. 1825-30.  
13  
14
- 15 11. Moher, D., et al., *Preferred reporting items for systematic review and meta-analysis*  
16  
17 *protocols (PRISMA-P) 2015 statement*. *Syst Rev*, 2015. **4**: p. 1.  
18  
19
- 20 12. Shamseer, L., et al., *Preferred reporting items for systematic review and meta-analysis*  
21  
22 *protocols (PRISMA-P) 2015: elaboration and explanation*. *BMJ*, 2015. **350**: p. g7647.  
23  
24
- 25 13. Higgins, J., et al., *Appraising the risk of bias in randomized trials using the Cochrane Risk*  
26  
27 *of Bias Tool*. *Cochrane Database of Systematic Reviews*, 2016. **10**(Suppl 1).  
28  
29
- 30 14. Sterne, J.A., et al., *ROBINS-I: a tool for assessing risk of bias in non-randomised studies of*  
31  
32 *interventions*. *BMJ*, 2016. **355**: p. i4919.  
33  
34  
35  
36  
37  
38  
39  
40  
41  
42  
43  
44  
45  
46  
47  
48  
49  
50  
51  
52  
53  
54  
55  
56  
57  
58  
59  
60

## Acknowledgements

We would like to thank the library services at King's College London for help with the systematic review process.

## Contributors

NW conceived the idea for this study. All authors devised the study design. SG drafted the protocol with significant contributions from NW and AK. SG and SSB will perform the literature review and SG will draft the results.

## Funding

NW receives funding from the Wellcome Trust to undertake a Clinical PhD in Global Health at King's Centre for Global Health and Health Partnerships, King's College London.

## Competing Interests

The authors have no competing interests to declare.

## Supplementary File 1

## Investigating the Use of Ultrasonography for the Antenatal Diagnosis of Structural Congenital Anomalies in Low- and Middle-Income Countries: A Systematic Review Protocol

## PRISMA-P (Preferred Reporting Items for Systematic review and Meta-Analysis Protocols) 2015 Checklist

| Section and topic                 | Item No | Checklist item                                                                                                                                                                                                                | Section Where Addressed in Protocol           |
|-----------------------------------|---------|-------------------------------------------------------------------------------------------------------------------------------------------------------------------------------------------------------------------------------|-----------------------------------------------|
| <b>Administrative information</b> |         |                                                                                                                                                                                                                               |                                               |
| Title:                            |         |                                                                                                                                                                                                                               |                                               |
| Identification                    | 1a      | Identify the report as a protocol of a systematic review                                                                                                                                                                      | Title Page                                    |
| Update                            | 1b      | If the protocol is for an update of a previous systematic review, identify as such                                                                                                                                            | N/A                                           |
| Registration                      | 2       | If registered, provide the name of the registry (such as PROSPERO) and registration number                                                                                                                                    | Title Page                                    |
| Authors:                          |         |                                                                                                                                                                                                                               |                                               |
| Contact                           | 3a      | Provide name, institutional affiliation, e-mail address of all protocol authors; provide physical mailing address of corresponding author                                                                                     | Title Page                                    |
| Contributions                     | 3b      | Describe contributions of protocol authors and identify the guarantor of the review                                                                                                                                           | Contributors                                  |
| Amendments                        | 4       | If the protocol represents an amendment of a previously completed or published protocol, identify as such and list changes; otherwise, state plan for documenting important protocol amendments                               | Methods and Analysis                          |
| Support:                          |         |                                                                                                                                                                                                                               |                                               |
| Sources                           | 5a      | Indicate sources of financial or other support for the review                                                                                                                                                                 | Funding                                       |
| Sponsor                           | 5b      | Provide name for the review funder and/or sponsor                                                                                                                                                                             | Funding                                       |
| Role of sponsor or funder         | 5c      | Describe roles of funder(s), sponsor(s), and/or institution(s), if any, in developing the protocol                                                                                                                            | Funding                                       |
| <b>Introduction</b>               |         |                                                                                                                                                                                                                               |                                               |
| Rationale                         | 6       | Describe the rationale for the review in the context of what is already known                                                                                                                                                 | Introduction                                  |
| Objectives                        | 7       | Provide an explicit statement of the question(s) the review will address with reference to participants, interventions, comparators, and outcomes (PICO)                                                                      | Aim; Objectives                               |
| <b>Methods</b>                    |         |                                                                                                                                                                                                                               |                                               |
| Eligibility criteria              | 8       | Specify the study characteristics (such as PICO, study design, setting, time frame) and report characteristics (such as years considered, language, publication status) to be used as criteria for eligibility for the review | Search Strategy; Inclusion/Exclusion Criteria |
| Information sources               | 9       | Describe all intended information sources (such as electronic databases, contact with study authors, trial registers or other grey literature sources) with planned dates of coverage                                         | Published Literature Search                   |

| Section and topic                  | Item No | Checklist item                                                                                                                                                                                                                                   | Section Where Addressed in Protocol                |
|------------------------------------|---------|--------------------------------------------------------------------------------------------------------------------------------------------------------------------------------------------------------------------------------------------------|----------------------------------------------------|
| Search strategy                    | 10      | Present draft of search strategy to be used for at least one electronic database, including planned limits, such that it could be repeated                                                                                                       | Search Strategy; Table 1; Supplementary Document 2 |
| Study records:                     |         |                                                                                                                                                                                                                                                  |                                                    |
| Data management                    | 11a     | Describe the mechanism(s) that will be used to manage records and data throughout the review                                                                                                                                                     | Study Screening; Data Extraction                   |
| Selection process                  | 11b     | State the process that will be used for selecting studies (such as two independent reviewers) through each phase of the review (that is, screening, eligibility and inclusion in meta-analysis)                                                  | Study Screening                                    |
| Data collection process            | 11c     | Describe planned method of extracting data from reports (such as piloting forms, done independently, in duplicate), any processes for obtaining and confirming data from investigators                                                           | Data Extraction                                    |
| Data items                         | 12      | List and define all variables for which data will be sought (such as PICO items, funding sources), any pre-planned data assumptions and simplifications                                                                                          | Data Extraction                                    |
| Outcomes and prioritization        | 13      | List and define all outcomes for which data will be sought, including prioritization of main and additional outcomes, with rationale                                                                                                             | Data Extraction                                    |
| Risk of bias in individual studies | 14      | Describe anticipated methods for assessing risk of bias of individual studies, including whether this will be done at the outcome or study level, or both; state how this information will be used in data synthesis                             | Methodological Quality                             |
| Data synthesis                     | 15a     | Describe criteria under which study data will be quantitatively synthesized                                                                                                                                                                      | Data Synthesis                                     |
|                                    | 15b     | If data are appropriate for quantitative synthesis, describe planned summary measures, methods of handling data and methods of combining data from studies, including any planned exploration of consistency (such as $I^2$ , Kendall's $\tau$ ) | Data Synthesis                                     |
|                                    | 15c     | Describe any proposed additional analyses (such as sensitivity or subgroup analyses, meta-regression)                                                                                                                                            | N/A                                                |
|                                    | 15d     | If quantitative synthesis is not appropriate, describe the type of summary planned                                                                                                                                                               | Data Synthesis                                     |
| Meta-bias(es)                      | 16      | Specify any planned assessment of meta-bias(es) (such as publication bias across studies, selective reporting within studies)                                                                                                                    | Data Synthesis                                     |
| Confidence in cumulative evidence  | 17      | Describe how the strength of the body of evidence will be assessed (such as GRADE)                                                                                                                                                               | Data Synthesis                                     |

From: Shamseer L, Moher D, Clarke M, Ghersi D, Liberati A, Petticrew M, Shekelle P, Stewart L, PRISMA-P Group. Preferred reporting items for systematic review and meta-analysis protocols (PRISMA-P) 2015: elaboration and explanation. *BMJ*. 2015 Jan 2;349(jan02 1):g7647.

## Supplementary File 2

## Investigating the Use of Ultrasonography for the Antenatal Diagnosis of Structural Congenital Anomalies in Low- and Middle-Income Countries: A Systematic Review Protocol

Database: Ovid MEDLINE(R) Epub Ahead of Print, In-Process & Other Non-Indexed Citations, Ovid MEDLINE(R) Daily, Ovid MEDLINE and Versions(R) <1946 to June 27, 2018>

## Search Strategy:

| No. | Search Terms                                                                                                                                                                                                                                                                        | Results |
|-----|-------------------------------------------------------------------------------------------------------------------------------------------------------------------------------------------------------------------------------------------------------------------------------------|---------|
| 1   | exp Congenital Abnormalities/ or congenital anomal*.mp.                                                                                                                                                                                                                             | 559922  |
| 2   | exp Congenital Abnormalities/ or Congenital Abnormal*.mp.                                                                                                                                                                                                                           | 555311  |
| 3   | Congenital Malformation*.mp.                                                                                                                                                                                                                                                        | 13826   |
| 4   | Fetal Malformation*.mp.                                                                                                                                                                                                                                                             | 1917    |
| 5   | Birth Defect*.mp.                                                                                                                                                                                                                                                                   | 9122    |
| 6   | Anencephaly.mp. or exp ANENCEPHALY/                                                                                                                                                                                                                                                 | 3875    |
| 7   | Conjoined Twins.mp. or exp Twins, Conjoined/                                                                                                                                                                                                                                        | 2022    |
| 8   | exp Heart Defects, Congenital/ or Congenital Heart Defect*.mp.                                                                                                                                                                                                                      | 142854  |
| 9   | Anorectal Malformation*.mp.                                                                                                                                                                                                                                                         | 1896    |
| 10  | Anal Stenosis.mp.                                                                                                                                                                                                                                                                   | 389     |
| 11  | Anal Atresia.mp. or exp Anus, Imperforate/                                                                                                                                                                                                                                          | 2815    |
| 12  | Imperforate Anus.mp. or exp Anus, Imperforate/                                                                                                                                                                                                                                      | 2992    |
| 13  | Biliary atresia.mp. or exp Biliary Atresia/                                                                                                                                                                                                                                         | 4482    |
| 14  | exp Choledochal Cyst/ or Choledochal Cyst*.mp.                                                                                                                                                                                                                                      | 2825    |
| 15  | exp Diaphragmatic Eventration/ or Diaphragmatic Eventration*.mp.                                                                                                                                                                                                                    | 943     |
| 16  | Esophageal Atresia.mp. or exp Esophageal Atresia/                                                                                                                                                                                                                                   | 4173    |
| 17  | exp Tracheoesophageal Fistula/ or Tracheo-?esophageal fistula*.mp.                                                                                                                                                                                                                  | 3676    |
| 18  | Intestinal Atresia.mp. or exp Intestinal Atresia/                                                                                                                                                                                                                                   | 2301    |
| 19  | Duodenal atresia.mp.                                                                                                                                                                                                                                                                | 839     |
| 20  | Colonic Atresia.mp.                                                                                                                                                                                                                                                                 | 152     |
| 21  | Malrotation.mp.                                                                                                                                                                                                                                                                     | 2393    |
| 22  | Apple peel syndrome.mp.                                                                                                                                                                                                                                                             | 16      |
| 23  | exp Hernias, Diaphragmatic, Congenital/ or congenital diaphragmatic hernia*.mp.                                                                                                                                                                                                     | 5530    |
| 24  | Gastroschisis.mp. or exp GASTROSCHISIS/                                                                                                                                                                                                                                             | 2313    |
| 25  | Abdominal Wall Defect*.mp.                                                                                                                                                                                                                                                          | 2009    |
| 26  | Exomphalos.mp. or exp Hernia, Umbilical/                                                                                                                                                                                                                                            | 3740    |
| 27  | Omphalocele.mp. or exp Hernia, Umbilical/                                                                                                                                                                                                                                           | 4242    |
| 28  | Congenital Limb Deformities.mp. or exp Limb Deformities, Congenital/                                                                                                                                                                                                                | 22483   |
| 29  | exp Neural Tube Defects/ or Neural Tube Defect*.mp.                                                                                                                                                                                                                                 | 29051   |
| 30  | exp Bronchogenic Cyst/ or Bronchogenic Cyst*.mp.                                                                                                                                                                                                                                    | 1810    |
| 31  | exp Bronchopulmonary Sequestration/ or Bronchopulmonary sequestration*.mp.                                                                                                                                                                                                          | 2022    |
| 32  | exp "Cystic Adenomatoid Malformation of Lung, Congenital"/ or Congenital Cystic adenomatoid malformation of lung*.mp.                                                                                                                                                               | 874     |
| 33  | Renal Anomal*.mp.                                                                                                                                                                                                                                                                   | 1185    |
| 34  | exp Urogenital Abnormalities/ or Genito-urinary Anomalies.mp.                                                                                                                                                                                                                       | 57735   |
| 35  | exp Maxillofacial Abnormalities/ or Maxillofacial Abnormalit*.mp.                                                                                                                                                                                                                   | 28265   |
| 36  | exp Mouth Abnormalities/ or Mouth Abnormalit*.mp.                                                                                                                                                                                                                                   | 24459   |
| 37  | Umbilical Hernia.mp. or exp Hernia, Umbilical/                                                                                                                                                                                                                                      | 4200    |
| 38  | Hirschsprung disease.mp. or exp Hirschsprung Disease/                                                                                                                                                                                                                               | 4567    |
| 39  | exp Megacolon/ or Ganglionic Megacolon.mp.                                                                                                                                                                                                                                          | 7053    |
| 40  | Rectosigmoid aganglionosis.mp.                                                                                                                                                                                                                                                      | 15      |
| 41  | Colonic Aganglionosis.mp.                                                                                                                                                                                                                                                           | 311     |
| 42  | Intestinal Aganglionosis.mp.                                                                                                                                                                                                                                                        | 190     |
| 43  | Volvulus.mp. or exp Intestinal Volvulus/                                                                                                                                                                                                                                            | 8927    |
| 44  | LMICs.mp.                                                                                                                                                                                                                                                                           | 2001    |
| 45  | (low- and middle-income countr*).mp. [mp=title, abstract, original title, name of substance word, subject heading word, floating sub-heading word, keyword heading word, protocol supplementary concept word, rare disease supplementary concept word, unique identifier, synonyms] | 10910   |
| 46  | Low-resource setting*.mp.                                                                                                                                                                                                                                                           | 2719    |



|     |                                                                                                                                                                                                                                                                             |        |
|-----|-----------------------------------------------------------------------------------------------------------------------------------------------------------------------------------------------------------------------------------------------------------------------------|--------|
| 47  | Underdeveloped Countries.mp.                                                                                                                                                                                                                                                | 817    |
| 48  | low-income countries.mp.                                                                                                                                                                                                                                                    | 4707   |
| 49  | exp Developing Countries/ or Developing countr*.mp.                                                                                                                                                                                                                         | 115302 |
| 50  | middle-income countries.mp.                                                                                                                                                                                                                                                 | 11136  |
| 51  | limited resource setting*.mp.                                                                                                                                                                                                                                               | 253    |
| 52  | Africa South of the Sahara.mp. or exp "Africa South of the Sahara"/                                                                                                                                                                                                         | 184102 |
| 53  | Sub-Saharan Africa.mp. or exp "Africa South of the Sahara"/                                                                                                                                                                                                                 | 190396 |
| 54  | Less Resourced communities.mp.                                                                                                                                                                                                                                              | 1      |
| 55  | Afghanistan.mp. or exp AFGHANISTAN/                                                                                                                                                                                                                                         | 6065   |
| 56  | Albania.mp. or exp ALBANIA/                                                                                                                                                                                                                                                 | 1182   |
| 57  | Algeria.mp. or exp ALGERIA/                                                                                                                                                                                                                                                 | 3621   |
| 58  | American Samoa.mp.                                                                                                                                                                                                                                                          | 354    |
| 59  | Angola.mp. or exp ANGOLA/                                                                                                                                                                                                                                                   | 1403   |
| 60  | Argentina.mp. or exp ARGENTINA/                                                                                                                                                                                                                                             | 19610  |
| 61  | Armenia.mp. or exp ARMENIA/                                                                                                                                                                                                                                                 | 1676   |
| 62  | Azerbaijan.mp. or exp AZERBAIJAN/                                                                                                                                                                                                                                           | 1765   |
| 63  | Bangladesh.mp. or exp BANGLADESH/                                                                                                                                                                                                                                           | 12907  |
| 64  | Belarus.mp. or exp "Republic of Belarus"/                                                                                                                                                                                                                                   | 2553   |
| 65  | Belize.mp. or exp BELIZE/                                                                                                                                                                                                                                                   | 868    |
| 66  | Benin.mp. or exp BENIN/                                                                                                                                                                                                                                                     | 3441   |
| 67  | exp BHUTAN/ or Bhutan.mp.                                                                                                                                                                                                                                                   | 628    |
| 68  | Bolivia.mp. or exp BOLIVIA/                                                                                                                                                                                                                                                 | 3594   |
| 69  | (Bosnia and Herzegovina).mp. [mp=title, abstract, original title, name of substance word, subject heading word, floating sub-heading word, keyword heading word, protocol supplementary concept word, rare disease supplementary concept word, unique identifier, synonyms] | 2477   |
| 70  | Botswana.mp. or exp BOTSWANA/                                                                                                                                                                                                                                               | 2247   |
| 71  | Brazil.mp. or exp BRAZIL/                                                                                                                                                                                                                                                   | 101919 |
| 72  | Bulgaria.mp. or exp BULGARIA/                                                                                                                                                                                                                                               | 7554   |
| 73  | Burkina Faso.mp. or exp Burkina Faso/                                                                                                                                                                                                                                       | 3904   |
| 74  | Burundi.mp. or exp BURUNDI/                                                                                                                                                                                                                                                 | 871    |
| 75  | Cabo Verde.mp. or exp Cabo Verde/                                                                                                                                                                                                                                           | 211    |
| 76  | Cambodia.mp. or exp CAMBODIA/                                                                                                                                                                                                                                               | 4102   |
| 77  | Cameroon.mp. or exp CAMEROON/                                                                                                                                                                                                                                               | 6804   |
| 78  | Central African Republic.mp. or exp Central African Republic/                                                                                                                                                                                                               | 1096   |
| 79  | Chad.mp. or exp CHAD/                                                                                                                                                                                                                                                       | 1144   |
| 80  | China.mp. or exp CHINA/                                                                                                                                                                                                                                                     | 205799 |
| 81  | Colombia.mp. or exp COLOMBIA/                                                                                                                                                                                                                                               | 12533  |
| 82  | Comoros.mp. or exp COMOROS/                                                                                                                                                                                                                                                 | 427    |
| 83  | Democratic Republic of the Congo.mp. or exp "Democratic Republic of the Congo"/                                                                                                                                                                                             | 4506   |
| 84  | exp "Democratic Republic of the Congo"/ or DRC.mp.                                                                                                                                                                                                                          | 4827   |
| 85  | Republic of the Congo.mp. or exp Congo/                                                                                                                                                                                                                                     | 6176   |
| 86  | Costa Rica.mp. or exp Costa Rica/                                                                                                                                                                                                                                           | 5088   |
| 87  | Cote d'Ivoire.mp. or exp Cote d'Ivoire/                                                                                                                                                                                                                                     | 3527   |
| 88  | Ivory Coast.mp. or exp Cote d'Ivoire/                                                                                                                                                                                                                                       | 3432   |
| 89  | Croatia.mp. or exp CROATIA/                                                                                                                                                                                                                                                 | 8261   |
| 90  | Cuba.mp. or exp CUBA/                                                                                                                                                                                                                                                       | 6343   |
| 91  | Djibouti.mp. or exp DJIBOUTI/                                                                                                                                                                                                                                               | 372    |
| 92  | Dominica.mp. or exp DOMINICA/                                                                                                                                                                                                                                               | 430    |
| 93  | Dominican Republic.mp. or exp Dominican Republic/                                                                                                                                                                                                                           | 2128   |
| 94  | Ecuador.mp. or exp ECUADOR/                                                                                                                                                                                                                                                 | 4722   |
| 95  | exp EGYPT/ or Egypt.mp.                                                                                                                                                                                                                                                     | 18702  |
| 96  | El Salvador.mp. or exp El Salvador/                                                                                                                                                                                                                                         | 1319   |
| 97  | Equatorial Guinea.mp. or exp Equatorial Guinea/                                                                                                                                                                                                                             | 419    |
| 98  | Eritrea.mp. or exp ERITREA/                                                                                                                                                                                                                                                 | 518    |
| 99  | Ethiopia.mp. or exp ETHIOPIA/                                                                                                                                                                                                                                               | 13354  |
| 100 | Fiji.mp. or exp FIJI/                                                                                                                                                                                                                                                       | 1620   |
| 101 | Gabon.mp. or exp GABON/                                                                                                                                                                                                                                                     | 1925   |
| 102 | exp GAMBIA/ or Gambia.mp.                                                                                                                                                                                                                                                   | 2958   |
| 103 | exp "GEORGIA (REPUBLIC)"/ or exp GEORGIA/ or Georgia.mp.                                                                                                                                                                                                                    | 15842  |
| 104 | Ghana.mp. or exp GHANA/                                                                                                                                                                                                                                                     | 9432   |
| 105 | Grenada.mp. or exp GRENADA/                                                                                                                                                                                                                                                 | 308    |
| 106 | Guatemala.mp. or exp GUATEMALA/                                                                                                                                                                                                                                             | 3907   |
| 107 | Guinea.mp. or exp GUINEA-BISSAU/ or exp EQUATORIAL GUINEA/ or exp GUINEA/ or exp PAPUA NEW GUINEA/ or exp NEW GUINEA/                                                                                                                                                       | 160074 |
| 108 | Guyana.mp. or exp GUYANA/                                                                                                                                                                                                                                                   | 1136   |
| 109 | Haiti.mp. or exp HAITI/                                                                                                                                                                                                                                                     | 3707   |
| 110 | Honduras.mp. or exp HONDURAS/                                                                                                                                                                                                                                               | 1736   |

|     |                                                                                                                                                                                                                                                                                       |        |
|-----|---------------------------------------------------------------------------------------------------------------------------------------------------------------------------------------------------------------------------------------------------------------------------------------|--------|
| 111 | India.mp. or exp INDIA/                                                                                                                                                                                                                                                               | 129215 |
| 112 | Indonesia.mp. or exp INDONESIA/                                                                                                                                                                                                                                                       | 13107  |
| 113 | exp Iran/ or Islamic Republic of Iran.mp.                                                                                                                                                                                                                                             | 21280  |
| 114 | exp IRAQ/ or Iraq.mp.                                                                                                                                                                                                                                                                 | 9035   |
| 115 | Jamaica.mp. or exp JAMAICA/                                                                                                                                                                                                                                                           | 4427   |
| 116 | Jordan.mp. or exp JORDAN/                                                                                                                                                                                                                                                             | 6040   |
| 117 | Kazakhstan.mp. or exp KAZAKHSTAN/                                                                                                                                                                                                                                                     | 3153   |
| 118 | Kenya.mp. or exp KENYA/                                                                                                                                                                                                                                                               | 18798  |
| 119 | Kiribati.mp. or exp Micronesia/                                                                                                                                                                                                                                                       | 1934   |
| 120 | Democratic People's Republic of Korea.mp. or exp "Democratic People's Republic of Korea"/                                                                                                                                                                                             | 246    |
| 121 | Kosovo.mp. or exp KOSOVO/                                                                                                                                                                                                                                                             | 840    |
| 122 | Kyrgyz Republic.mp. or exp Kyrgyzstan/                                                                                                                                                                                                                                                | 1225   |
| 123 | exp Laos/ or Lao PDR.mp.                                                                                                                                                                                                                                                              | 1876   |
| 124 | Laos.mp. or exp LAOS/                                                                                                                                                                                                                                                                 | 2431   |
| 125 | Lebanon.mp. or exp LEBANON/                                                                                                                                                                                                                                                           | 5011   |
| 126 | Lesotho.mp. or exp LESOTHO/                                                                                                                                                                                                                                                           | 645    |
| 127 | Liberia.mp. or exp LIBERIA/                                                                                                                                                                                                                                                           | 1667   |
| 128 | Libya.mp. or exp LIBYA/                                                                                                                                                                                                                                                               | 1554   |
| 129 | Macedonia Republic.mp. or exp "Macedonia (Republic)"/                                                                                                                                                                                                                                 | 475    |
| 130 | Madagascar.mp. or exp MADAGASCAR/                                                                                                                                                                                                                                                     | 4734   |
| 131 | Malawi.mp. or exp MALAWI/                                                                                                                                                                                                                                                             | 6317   |
| 132 | Malaysia.mp. or exp MALAYSIA/                                                                                                                                                                                                                                                         | 18390  |
| 133 | Maldives.mp. or exp Indian Ocean Islands/                                                                                                                                                                                                                                             | 10595  |
| 134 | Mali.mp. or exp MALI/                                                                                                                                                                                                                                                                 | 3511   |
| 135 | Marshall Islands.mp. or exp Micronesia/                                                                                                                                                                                                                                               | 1959   |
| 136 | Mauritania.mp. or exp MAURITANIA/                                                                                                                                                                                                                                                     | 626    |
| 137 | Mauritius.mp. or exp MAURITIUS/                                                                                                                                                                                                                                                       | 953    |
| 138 | exp MEXICO/ or Mexico.mp.                                                                                                                                                                                                                                                             | 53282  |
| 139 | Micronesia.mp. or exp MICRONESIA/                                                                                                                                                                                                                                                     | 2243   |
| 140 | Moldova.mp. or exp MOLDOVA/                                                                                                                                                                                                                                                           | 920    |
| 141 | Mongolia.mp. or exp MONGOLIA/                                                                                                                                                                                                                                                         | 3809   |
| 142 | Montenegro.mp. or exp MONTENEGRO/                                                                                                                                                                                                                                                     | 749    |
| 143 | Morocco.mp. or exp MOROCCO/                                                                                                                                                                                                                                                           | 6855   |
| 144 | Mozambique.mp. or exp MOZAMBIQUE/                                                                                                                                                                                                                                                     | 3236   |
| 145 | Myanmar.mp. or exp MYANMAR/                                                                                                                                                                                                                                                           | 3198   |
| 146 | Namibia.mp. or exp NAMIBIA                                                                                                                                                                                                                                                            | 1502   |
| 147 | Nauru.mp. or exp Micronesia/                                                                                                                                                                                                                                                          | 1921   |
| 148 | Nepal.mp. or exp NEPAL/                                                                                                                                                                                                                                                               | 9337   |
| 149 | Nicaragua.mp. or exp NICARAGUA/                                                                                                                                                                                                                                                       | 1949   |
| 150 | exp NIGER/ or Niger.mp.                                                                                                                                                                                                                                                               | 12299  |
| 151 | Nigeria.mp. or exp NIGERIA/                                                                                                                                                                                                                                                           | 32627  |
| 152 | Pakistan.mp. or exp PAKISTAN/                                                                                                                                                                                                                                                         | 20153  |
| 153 | exp PANAMA/ or Panama.mp.                                                                                                                                                                                                                                                             | 4265   |
| 154 | Papua New Guinea.mp. or exp Papua New Guinea/                                                                                                                                                                                                                                         | 5003   |
| 155 | Paraguay.mp. or exp PARAGUAY/                                                                                                                                                                                                                                                         | 1433   |
| 156 | Peru.mp. or exp PERU/                                                                                                                                                                                                                                                                 | 11249  |
| 157 | Philippines.mp. or exp PHILIPPINES/                                                                                                                                                                                                                                                   | 10698  |
| 158 | Romania.mp. or exp ROMANIA/                                                                                                                                                                                                                                                           | 11521  |
| 159 | exp Russia/ or Russian Federation.mp.                                                                                                                                                                                                                                                 | 51376  |
| 160 | Rwanda.mp. or exp RWANDA/                                                                                                                                                                                                                                                             | 2883   |
| 161 | exp AMERICAN SAMOA/ or Samoa.mp. or exp SAMOA/ or exp "INDEPENDENT STATE OF SAMOA"/                                                                                                                                                                                                   | 1024   |
| 162 | (Sao Tome and Principe).mp. [mp=title, abstract, original title, name of substance word, subject heading word, floating sub-heading word, keyword heading word, protocol supplementary concept word, rare disease supplementary concept word, unique identifier, synonyms]            | 135    |
| 163 | Senegal.mp. or exp SENEGAL/                                                                                                                                                                                                                                                           | 7067   |
| 164 | Serbia.mp. or exp SERBIA/                                                                                                                                                                                                                                                             | 4574   |
| 165 | Sierra Leone.mp. or exp Sierra Leone/                                                                                                                                                                                                                                                 | 2103   |
| 166 | Solomon Islands.mp. or exp Melanesia/                                                                                                                                                                                                                                                 | 6193   |
| 167 | Somalia.mp. or exp SOMALIA/                                                                                                                                                                                                                                                           | 1968   |
| 168 | Somaliland.mp.                                                                                                                                                                                                                                                                        | 136    |
| 169 | South Africa.mp. or exp South Africa/                                                                                                                                                                                                                                                 | 47075  |
| 170 | South Sudan.mp. or exp South Sudan/                                                                                                                                                                                                                                                   | 397    |
| 171 | Sri Lanka.mp. or exp Sri Lanka/                                                                                                                                                                                                                                                       | 7342   |
| 172 | Saint Lucia.mp. or exp Saint Lucia/                                                                                                                                                                                                                                                   | 114    |
| 173 | (Saint Vincent and the Grenadines).mp. [mp=title, abstract, original title, name of substance word, subject heading word, floating sub-heading word, keyword heading word, protocol supplementary concept word, rare disease supplementary concept word, unique identifier, synonyms] | 57     |

|     |                                                                                                                                                                                                                                                                                                                                                                                                                                                                                                                                                                                                                                                                                                                                                                                                                                                                                                                                                                                                                                                                                    |         |
|-----|------------------------------------------------------------------------------------------------------------------------------------------------------------------------------------------------------------------------------------------------------------------------------------------------------------------------------------------------------------------------------------------------------------------------------------------------------------------------------------------------------------------------------------------------------------------------------------------------------------------------------------------------------------------------------------------------------------------------------------------------------------------------------------------------------------------------------------------------------------------------------------------------------------------------------------------------------------------------------------------------------------------------------------------------------------------------------------|---------|
| 174 | exp SUDAN/ or Sudan.mp.                                                                                                                                                                                                                                                                                                                                                                                                                                                                                                                                                                                                                                                                                                                                                                                                                                                                                                                                                                                                                                                            | 8429    |
| 175 | Suriname.mp. or exp SURINAME/                                                                                                                                                                                                                                                                                                                                                                                                                                                                                                                                                                                                                                                                                                                                                                                                                                                                                                                                                                                                                                                      | 1098    |
| 176 | Swaziland.mp. or exp SWAZILAND/                                                                                                                                                                                                                                                                                                                                                                                                                                                                                                                                                                                                                                                                                                                                                                                                                                                                                                                                                                                                                                                    | 818     |
| 177 | Syrian Arab Republic.mp.                                                                                                                                                                                                                                                                                                                                                                                                                                                                                                                                                                                                                                                                                                                                                                                                                                                                                                                                                                                                                                                           | 73      |
| 178 | Syria.mp. or exp SYRIA/                                                                                                                                                                                                                                                                                                                                                                                                                                                                                                                                                                                                                                                                                                                                                                                                                                                                                                                                                                                                                                                            | 2407    |
| 179 | Tajikistan.mp. or exp TAJIKISTAN/                                                                                                                                                                                                                                                                                                                                                                                                                                                                                                                                                                                                                                                                                                                                                                                                                                                                                                                                                                                                                                                  | 910     |
| 180 | Tanzania.mp. or exp TANZANIA/                                                                                                                                                                                                                                                                                                                                                                                                                                                                                                                                                                                                                                                                                                                                                                                                                                                                                                                                                                                                                                                      | 12921   |
| 181 | Thailand.mp. or exp THAILAND/                                                                                                                                                                                                                                                                                                                                                                                                                                                                                                                                                                                                                                                                                                                                                                                                                                                                                                                                                                                                                                                      | 32186   |
| 182 | exp Timor-Leste/ or Timor-Leste.mp.                                                                                                                                                                                                                                                                                                                                                                                                                                                                                                                                                                                                                                                                                                                                                                                                                                                                                                                                                                                                                                                | 311     |
| 183 | East Timor.mp.                                                                                                                                                                                                                                                                                                                                                                                                                                                                                                                                                                                                                                                                                                                                                                                                                                                                                                                                                                                                                                                                     | 187     |
| 184 | Togo.mp. or exp TOGO/                                                                                                                                                                                                                                                                                                                                                                                                                                                                                                                                                                                                                                                                                                                                                                                                                                                                                                                                                                                                                                                              | 1491    |
| 185 | Tonga.mp. or exp TONGA/                                                                                                                                                                                                                                                                                                                                                                                                                                                                                                                                                                                                                                                                                                                                                                                                                                                                                                                                                                                                                                                            | 463     |
| 186 | Tunisia.mp. or exp TUNISIA/                                                                                                                                                                                                                                                                                                                                                                                                                                                                                                                                                                                                                                                                                                                                                                                                                                                                                                                                                                                                                                                        | 9057    |
| 187 | exp TURKEY/ or Turkey.mp.                                                                                                                                                                                                                                                                                                                                                                                                                                                                                                                                                                                                                                                                                                                                                                                                                                                                                                                                                                                                                                                          | 46898   |
| 188 | Turkmenistan.mp. or exp TURKMENISTAN/                                                                                                                                                                                                                                                                                                                                                                                                                                                                                                                                                                                                                                                                                                                                                                                                                                                                                                                                                                                                                                              | 717     |
| 189 | Tuvalu.mp. or exp Micronesia/                                                                                                                                                                                                                                                                                                                                                                                                                                                                                                                                                                                                                                                                                                                                                                                                                                                                                                                                                                                                                                                      | 1884    |
| 190 | Uganda.mp. or exp UGANDA/                                                                                                                                                                                                                                                                                                                                                                                                                                                                                                                                                                                                                                                                                                                                                                                                                                                                                                                                                                                                                                                          | 13956   |
| 191 | Ukraine.mp. or exp UKRAINE/                                                                                                                                                                                                                                                                                                                                                                                                                                                                                                                                                                                                                                                                                                                                                                                                                                                                                                                                                                                                                                                        | 16702   |
| 192 | Uzbekistan.mp. or exp UZBEKISTAN/                                                                                                                                                                                                                                                                                                                                                                                                                                                                                                                                                                                                                                                                                                                                                                                                                                                                                                                                                                                                                                                  | 2161    |
| 193 | Vanuatu.mp. or exp VANUATU/                                                                                                                                                                                                                                                                                                                                                                                                                                                                                                                                                                                                                                                                                                                                                                                                                                                                                                                                                                                                                                                        | 629     |
| 194 | Venezuela.mp. or exp VENEZUELA/                                                                                                                                                                                                                                                                                                                                                                                                                                                                                                                                                                                                                                                                                                                                                                                                                                                                                                                                                                                                                                                    | 6620    |
| 195 | exp VIETNAM/ or Vietnam.mp.                                                                                                                                                                                                                                                                                                                                                                                                                                                                                                                                                                                                                                                                                                                                                                                                                                                                                                                                                                                                                                                        | 15919   |
| 196 | (West Bank and Gaza).mp. [mp=title, abstract, original title, name of substance word, subject heading word, floating sub-heading word, keyword heading word, protocol supplementary concept word, rare disease supplementary concept word, unique identifier, synonyms]                                                                                                                                                                                                                                                                                                                                                                                                                                                                                                                                                                                                                                                                                                                                                                                                            | 194     |
| 197 | Republic of Yemen.mp. or exp Yemen/                                                                                                                                                                                                                                                                                                                                                                                                                                                                                                                                                                                                                                                                                                                                                                                                                                                                                                                                                                                                                                                | 1264    |
| 198 | Zambia.mp. or exp ZAMBIA/                                                                                                                                                                                                                                                                                                                                                                                                                                                                                                                                                                                                                                                                                                                                                                                                                                                                                                                                                                                                                                                          | 5404    |
| 199 | Zimbabwe.mp. or exp ZIMBABWE/                                                                                                                                                                                                                                                                                                                                                                                                                                                                                                                                                                                                                                                                                                                                                                                                                                                                                                                                                                                                                                                      | 6879    |
| 200 | Antenatal Diagnosis.mp.                                                                                                                                                                                                                                                                                                                                                                                                                                                                                                                                                                                                                                                                                                                                                                                                                                                                                                                                                                                                                                                            | 2383    |
| 201 | Prenatal Diagnosis.mp. or exp Prenatal Diagnosis/                                                                                                                                                                                                                                                                                                                                                                                                                                                                                                                                                                                                                                                                                                                                                                                                                                                                                                                                                                                                                                  | 74636   |
| 202 | Antenatal Screening.mp.                                                                                                                                                                                                                                                                                                                                                                                                                                                                                                                                                                                                                                                                                                                                                                                                                                                                                                                                                                                                                                                            | 1193    |
| 203 | Prenatal Screening.mp.                                                                                                                                                                                                                                                                                                                                                                                                                                                                                                                                                                                                                                                                                                                                                                                                                                                                                                                                                                                                                                                             | 2579    |
| 204 | Antenatal Ultrasound.mp.                                                                                                                                                                                                                                                                                                                                                                                                                                                                                                                                                                                                                                                                                                                                                                                                                                                                                                                                                                                                                                                           | 702     |
| 205 | Prenatal Ultrasound.mp.                                                                                                                                                                                                                                                                                                                                                                                                                                                                                                                                                                                                                                                                                                                                                                                                                                                                                                                                                                                                                                                            | 2203    |
| 206 | Antenatal Ultrasonography.mp.                                                                                                                                                                                                                                                                                                                                                                                                                                                                                                                                                                                                                                                                                                                                                                                                                                                                                                                                                                                                                                                      | 200     |
| 207 | Prenatal Ultrasonography.mp. or exp Ultrasonography, Prenatal/                                                                                                                                                                                                                                                                                                                                                                                                                                                                                                                                                                                                                                                                                                                                                                                                                                                                                                                                                                                                                     | 30427   |
| 208 | 1 or 2 or 3 or 4 or 5 or 6 or 7 or 8 or 9 or 10 or 11 or 12 or 13 or 14 or 15 or 16 or 17 or 18 or 19 or 20 or 21 or 22 or 23 or 24 or 25 or 26 or 27 or 28 or 29 or 30 or 31 or 32 or 33 or 34 or 35 or 36 or 37 or 38 or 39 or 40 or 41 or 42 or 43                                                                                                                                                                                                                                                                                                                                                                                                                                                                                                                                                                                                                                                                                                                                                                                                                              | 607001  |
| 209 | 44 or 45 or 46 or 47 or 48 or 49 or 50 or 51 or 52 or 53 or 54 or 55 or 56 or 57 or 58 or 59 or 60 or 61 or 62 or 63 or 64 or 65 or 66 or 67 or 68 or 69 or 70 or 71 or 72 or 73 or 74 or 75 or 76 or 77 or 78 or 79 or 80 or 81 or 82 or 83 or 84 or 85 or 86 or 87 or 88 or 89 or 90 or 91 or 92 or 93 or 94 or 95 or 96 or 97 or 98 or 99 or 100 or 101 or 102 or 103 or 104 or 105 or 106 or 107 or 108 or 109 or 110 or 111 or 112 or 113 or 114 or 115 or 116 or 117 or 118 or 119 or 120 or 121 or 122 or 123 or 124 or 125 or 126 or 127 or 128 or 129 or 130 or 131 or 132 or 133 or 134 or 135 or 136 or 137 or 138 or 139 or 140 or 141 or 142 or 143 or 144 or 145 or 146 or 147 or 148 or 149 or 150 or 151 or 152 or 153 or 154 or 155 or 156 or 157 or 158 or 159 or 160 or 161 or 162 or 163 or 164 or 165 or 166 or 167 or 168 or 169 or 170 or 171 or 172 or 173 or 174 or 175 or 176 or 177 or 178 or 179 or 180 or 181 or 182 or 183 or 184 or 185 or 186 or 187 or 188 or 189 or 190 or 191 or 192 or 193 or 194 or 195 or 196 or 197 or 198 or 199 (1385344) | 1385344 |
| 210 | 200 or 201 or 202 or 203 or 204 or 205 or 206 or 207                                                                                                                                                                                                                                                                                                                                                                                                                                                                                                                                                                                                                                                                                                                                                                                                                                                                                                                                                                                                                               | 77525   |
| 211 | 208 and 209 and 210                                                                                                                                                                                                                                                                                                                                                                                                                                                                                                                                                                                                                                                                                                                                                                                                                                                                                                                                                                                                                                                                | 896     |

# BMJ Paediatrics Open

## Investigating the Use of Ultrasonography for the Antenatal Diagnosis of Structural Congenital Anomalies in Low- and Middle-Income Countries: A Systematic Review Protocol

|                               |                                                                                                                                                                                                                                                                                                                                  |
|-------------------------------|----------------------------------------------------------------------------------------------------------------------------------------------------------------------------------------------------------------------------------------------------------------------------------------------------------------------------------|
| Journal:                      | <i>BMJ Paediatrics Open</i>                                                                                                                                                                                                                                                                                                      |
| Manuscript ID                 | bmjpo-2019-000538.R1                                                                                                                                                                                                                                                                                                             |
| Article Type:                 | Protocol                                                                                                                                                                                                                                                                                                                         |
| Date Submitted by the Author: | 14-Aug-2019                                                                                                                                                                                                                                                                                                                      |
| Complete List of Authors:     | Goley, Stephanie; King's College London, Department of Global Health & Social Medicine<br>Sakula-Barry, Sidonie; World Cancer Research Fund<br>Kelly, Ann; King's College London, Department of Global Health & Social Medicine<br>Wright, Naomi; King's College London, King's Centre for Global Health and Health Partnerships |
| Keywords:                     | Congenital Abnorm, Paediatric Surgery, Neonatology, Imaging                                                                                                                                                                                                                                                                      |
|                               |                                                                                                                                                                                                                                                                                                                                  |

SCHOLARONE™  
Manuscripts

# Investigating the Use of Ultrasonography for the Antenatal Diagnosis of Structural Congenital Anomalies in Low- and Middle-Income Countries: A Systematic Review Protocol

Stephanie Goley<sup>1</sup>, Sidonie Sakula-Barry<sup>2</sup>, Ann Kelly<sup>1</sup>, Naomi Wright<sup>3</sup>

<sup>1</sup> Department of Global Health & Social Medicine, King's College London, London, UK

<sup>2</sup> World Cancer Research Fund UK, London, UK

<sup>3</sup> King's Centre for Global Health and Health Partnerships, School of Population Health and Environmental Sciences, King's College London, London, UK

## Authors' Email Addresses:

info@stephgoley.com

sidonie.sakula-barry1@alumni.lshtm.ac.uk

ann.kelly@kcl.ac.uk

naomiwright@doctors.org.uk

## Corresponding Author:

Stephanie Goley, BA MSc

Department of Global Health & Social Medicine, King's College London, London, UK

Correspondence to: Centre for Global Health and Health Partnerships, Suite 2.13 Weston

Education Centre, Cutcombe Road, London, SE5 9RJ

Telephone: +1 (815) 830-5360

PROSPERO Registration: CRD42019105620

Registered on February 14, 2019

Prepared according to Prisma-P Guidelines

**What is known?**

- 97% of deaths from congenital anomalies occur in developing countries. Many of these deaths could be prevented with early diagnosis and intervention.
- Ultrasound machines are widely accessible and commonplace in HICs, but a number of factors limit the accessibility and effectiveness of ultrasound in LMICs.

**What will this study add?**

- To systematically investigate, for the first time, the availability and effectiveness of antenatal ultrasound in LMICs in order to elucidate disparities in congenital anomaly detection.
- To evaluate the effects of antenatal ultrasound on the morbidity and mortality rates of neonates with a structural congenital anomaly in LMICs.

**ABSTRACT**

**Introduction:** Congenital anomalies are the 5th leading cause of under-5 mortality globally. The greatest burden is faced by those in developing countries, where over 95% of deaths occur. Many of these deaths may have been preventable through antenatal diagnosis and early intervention. This study aims to conduct a systematic review that investigates the use of antenatal ultrasound to diagnose congenital anomalies and improve the health outcomes of infants in low- and middle-income countries (LMICs).

**Methods and Analysis:** A systematic literature review will be conducted using three search strings: 1) structural congenital anomalies; 2) LMICs; and 3) antenatal diagnosis. Four electronic databases will be searched: MEDLINE, EMBASE, PubMed, and the Cochrane Library. Title, abstract and full text screening will be undertaken in duplicate by two reviewers independently using Covidence. Consensus will be sought from the wider authorship for discrepancies. Data extraction will be undertaken by the principal investigator. The primary analysis will focus on the availability and effectiveness of antenatal ultrasound for structural congenital anomalies. Secondary outcomes will include neonatal morbidity and mortality, termination rates, and referral rates for further antenatal care. Descriptive statistics and a narrative synthesis will be included in the final report. Methodological quality of the included studies will be evaluated using the Cochrane-approved ROBINS-I and RoB 2.0 tools.

**Ethics and Dissemination:** Ethical approval is not required for conducting the systematic review as there will be no direct collection of data from individuals. The results will be submitted for publication in a scientific journal and presented internationally.

**Conclusion:** This is the first study, to our knowledge, to systematically review current literature on the use of antenatal ultrasound for the detection of congenital anomalies in LMICs. This is vital to define current practice, highlight global disparities and evaluate effects on health outcomes for infants in low-resource settings.

## INTRODUCTION

Congenital anomalies represent 9% of the global burden of surgical disease and are one of the leading causes of infant morbidity and mortality globally [1-4]. The burden of congenital anomalies is much greater in low- and middle-income countries (LMICs), comprising over 95% of deaths from these conditions [5, 6]. According to a report by the WHO, every year approximately 303,000 infants die within 4 weeks of birth due to congenital anomalies [7]. However, this is likely an underestimation, as statistics are undoubtedly skewed from underreporting, a lack of congenital anomaly registries, and unreliable medical records in many LMICs.

Structural congenital anomalies are physical deformities that occur during intrauterine development [7]. These anomalies include, but are not limited to, gastro-intestinal malformations, cleft lip and palate, heart defects, musculoskeletal anomalies, and neural tube defects [8]. If detected early and provided appropriate surgical intervention following birth, many structural congenital anomalies can be corrected avoiding preventable death or disability [7].

Advancements in ultrasound technology have allowed for early detection of structural congenital anomalies, which allows mothers and physicians to plan for an appropriate place of delivery and surgical intervention after birth [9]. In many cases, this can result in a significantly reduced risk of morbidity and mortality [10]. While ultrasound machines are widely accessible and commonplace in high-income countries, a number of factors limit the access and effectiveness of antenatal ultrasound in LMICs.

This study aims to systematically investigate, for the first time, the availability and effectiveness of antenatal ultrasound in the diagnosis of structural congenital anomalies in LMICs. Furthermore it aims to evaluate the effects of antenatal ultrasound on mortality and morbidity for neonates with a structural congenital anomaly in LMICs. Such information is vital to help clarify the existing disparities in antenatal ultrasound provision and the potential benefits for improved health outcomes through the delivery of this service in low-resource settings.

## METHODS

PRISMA-P guidelines will be followed in conducting this systematic review [11, 12] (Supplementary File 1). If there are amendments to the protocol, they will be reported in the publication of the results.

### Aim

To conduct a systematic review that investigates the use of antenatal ultrasound to diagnose congenital anomalies and improve the health outcomes of infants in low- and middle-income countries.

## Objectives

1. To systematically identify and describe studies that focus on the antenatal diagnosis of structural congenital anomalies in LMICs.
2. To evaluate the utilization and effectiveness of ultrasound machines in the antenatal diagnosis of structural congenital anomalies and to report the current practices and policies regarding congenital anomaly detection in LMICs.
3. To evaluate the effects of antenatal ultrasound on the morbidity and mortality rates of neonates with a structural congenital anomaly in LMICs.
4. To critique the methodological quality of the included articles.

## Patient and Public Involvement

Given that this is a systematic literature review, there will be no patient or public involvement for the data collection and review of the literature. However, public involvement will be important for prioritizing antenatal ultrasound on the political agenda. It will also be crucial for improving current antenatal healthcare programs. Following conclusion of this study, international parent/patient support groups and charities involving structural congenital anomalies will be approached to assist with the dissemination of the findings via their websites, social media, in person meetings and other appropriate routes. A plain English summary of the findings will be provided for this purpose.

## Search Strategy

A search will be conducted using three search strings (Table 1). Search string 1 will encompass structural congenital anomalies. Search string 2 will focus on the setting - LMICs. Finally, search string 3 will look at the antenatal diagnosis of structural congenital anomalies, particularly focusing on the use of ultrasound machines for detection. Boolean operators 'and' and 'or' will be utilized within the search to combine the search terms.

*Table 1: Search Strings*

| Search String 1                                                                                                                                                                                   | Search String 2                                                                                                                                                                                                                                                                                                                                                                                  | Search String 3                                                                                                                                                                  |
|---------------------------------------------------------------------------------------------------------------------------------------------------------------------------------------------------|--------------------------------------------------------------------------------------------------------------------------------------------------------------------------------------------------------------------------------------------------------------------------------------------------------------------------------------------------------------------------------------------------|----------------------------------------------------------------------------------------------------------------------------------------------------------------------------------|
| Congenital Anomalies, Congenital Abnormalities, Congenital Malformation, Fetal Malformation, Birth Defects, Anencephaly, Conjoined Twins, Congenital Heart Defects, Anorectal Malformations, Anal | LMICs, Low- and Middle-Income Countries, Developing Countries, Low-Resource Settings, Underdeveloped Countries, Low-Income Countries, Middle-Income Countries, Limited Resource Settings, Africa South of the Sahara, Sub-Saharan Africa, Less Resourced Communities, Afghanistan, Albania, Algeria, American Samoa, Angola, Argentina, Armenia, Azerbaijan, Bangladesh, Belarus, Belize, Benin, | Antenatal Diagnosis, Prenatal Diagnosis, Antenatal Screening, Prenatal Screening, Antenatal Ultrasound, Prenatal Ultrasound, Antenatal Ultrasonography, Prenatal Ultrasonography |



|                                                                                                                                                                                                                                                                                                                                                             |                                                                                                                                                                                                                                                                                                                                                                                                                                                                                                                                                                                                                                                                                                                                                                                                              |                                                                                                                                                                                                                                                                                                                                                                                                                                                                                                                                                                                                                                                                                                                                                                                                                                                                                                                                                                                                                                                                                                                                                                                                                                                                                                                                                                                                                                                                                                                                                                                            |  |
|-------------------------------------------------------------------------------------------------------------------------------------------------------------------------------------------------------------------------------------------------------------------------------------------------------------------------------------------------------------|--------------------------------------------------------------------------------------------------------------------------------------------------------------------------------------------------------------------------------------------------------------------------------------------------------------------------------------------------------------------------------------------------------------------------------------------------------------------------------------------------------------------------------------------------------------------------------------------------------------------------------------------------------------------------------------------------------------------------------------------------------------------------------------------------------------|--------------------------------------------------------------------------------------------------------------------------------------------------------------------------------------------------------------------------------------------------------------------------------------------------------------------------------------------------------------------------------------------------------------------------------------------------------------------------------------------------------------------------------------------------------------------------------------------------------------------------------------------------------------------------------------------------------------------------------------------------------------------------------------------------------------------------------------------------------------------------------------------------------------------------------------------------------------------------------------------------------------------------------------------------------------------------------------------------------------------------------------------------------------------------------------------------------------------------------------------------------------------------------------------------------------------------------------------------------------------------------------------------------------------------------------------------------------------------------------------------------------------------------------------------------------------------------------------|--|
| 1<br>2<br>3<br>4<br>5<br>6<br>7<br>8<br>9<br>10<br>11<br>12<br>13<br>14<br>15<br>16<br>17<br>18<br>19<br>20<br>21<br>22<br>23<br>24<br>25<br>26<br>27<br>28<br>29<br>30<br>31<br>32<br>33<br>34<br>35<br>36<br>37<br>38<br>39<br>40<br>41<br>42<br>43<br>44<br>45<br>46<br>47<br>48<br>49<br>50<br>51<br>52<br>53<br>54<br>55<br>56<br>57<br>58<br>59<br>60 | <p>Stenosis, Anal Atresia, Imperforate Anus, Biliary Atresia, Choledochal Cyst, Diaphragmatic Eventration, Esophageal Atresia, Tracheoesophageal Fistula, Intestinal Atresia, Duodenal Obstruction, Duodenal Atresia, Colonic Atresia, Malrotation, Apple Peel Syndrome, Congenital Diaphragmatic Hernias, Gastroschisis, Abdominal Wall Defects, Exomphalos, Omphalocele, Congenital Limb Deformities, Neural Tube Defects, Bronchogenic Cyst, Bronchopulmonary Sequestration, Congenital Cystic Adenomatoid Malformation of Lung, Renal Anomalies, Genitourinary Anomalies, Maxillofacial Abnormalities, Mouth Abnormalities, Umbilical Hernia, Hirschsprung Disease, Ganglionic Megacolon, Rectosigmoid Aganglionosis, Colonic Aganglionosis, Intestinal Aganglionosis, Volvulus, Intestinal Volvulus</p> | <p>Bhutan, Bolivia, Bosnia and Herzegovina, Botswana, Brazil, Bulgaria, Burkina Faso, Burundi, Cabo Verde, Cambodia, Cameroon, Central African Republic, Chad, China, Colombia, Comoros, Democratic Republic of the Congo, DRC, Republic of the Congo, Costa Rica, Cote d'Ivoire, Ivory Coast, Croatia, Cuba, Djibouti, Dominica, Dominican Republic, Ecuador, Egypt, El Salvador, Equatorial Guinea, Eritrea, Ethiopia, Fiji, Gabon, Gambia, Georgia, Ghana, Grenada, Guatemala, Guinea, Guinea-Bissau, Guyana, Haiti, Honduras, India, Indonesia, Islamic Republic of Iran, Iraq, Jamaica, Jordan, Kazakhstan, Kenya, Kiribati, Democratic People's Republic of Korea, Kosovo, Kyrgyz Republic, Lao PDR, Laos, Lebanon, Lesotho, Liberia, Libya, Macedonia Republic, Madagascar, Malawi, Malaysia, Maldives, Mali, Marshall Islands, Mauritania, Mauritius, Mexico, Micronesia, Moldova, Mongolia, Montenegro, Morocco, Mozambique, Myanmar, Namibia, Nauru, Nepal, Nicaragua, Niger, Nigeria, Pakistan, Panama, Papua New Guinea, Paraguay, Peru, Philippines, Romania, Russian Federation, Rwanda, Samoa, Sao Tome and Principe, Senegal, Serbia, Sierra Leone, Solomon Islands, Somalia, Somaliland, South Africa, South Sudan, Sri Lanka, Saint Lucia, Saint Vincent and the Grenadines, Sudan, Suriname, Swaziland, Syrian Arab Republic, Syria, Tajikistan, Tanzania, Thailand, Timor-Leste, East Timor, Togo, Tonga, Tunisia, Turkey, Turkmenistan, Tuvalu, Uganda, Ukraine, Uzbekistan, Vanuatu, Venezuela, Vietnam, West Bank and Gaza, Republic of Yemen, Zambia, Zimbabwe</p> |  |
|-------------------------------------------------------------------------------------------------------------------------------------------------------------------------------------------------------------------------------------------------------------------------------------------------------------------------------------------------------------|--------------------------------------------------------------------------------------------------------------------------------------------------------------------------------------------------------------------------------------------------------------------------------------------------------------------------------------------------------------------------------------------------------------------------------------------------------------------------------------------------------------------------------------------------------------------------------------------------------------------------------------------------------------------------------------------------------------------------------------------------------------------------------------------------------------|--------------------------------------------------------------------------------------------------------------------------------------------------------------------------------------------------------------------------------------------------------------------------------------------------------------------------------------------------------------------------------------------------------------------------------------------------------------------------------------------------------------------------------------------------------------------------------------------------------------------------------------------------------------------------------------------------------------------------------------------------------------------------------------------------------------------------------------------------------------------------------------------------------------------------------------------------------------------------------------------------------------------------------------------------------------------------------------------------------------------------------------------------------------------------------------------------------------------------------------------------------------------------------------------------------------------------------------------------------------------------------------------------------------------------------------------------------------------------------------------------------------------------------------------------------------------------------------------|--|

1  
2  
3 A further search will be conducted on the WHO website in order to get a more robust  
4 understanding of current programs and policies in place for antenatal ultrasound. Researchers  
5 will initially search the following terms in the WHO Reproductive Health Library: ultrasound,  
6 ultrasonography, congenital anomalies, congenital abnormalities, congenital anomaly,  
7 congenital abnormality, birth defect, antenatal detection, prenatal detection, antenatal  
8 diagnosis, and prenatal diagnosis. These terms were chosen based on an initial screening  
9 performed by the researchers which suggested that these terms provided optimum sensitivity  
10 for procuring all relevant WHO literature for this review. Following the search of each term, the  
11 results will be expanded using a snowball strategy in order to ensure the inclusion of all  
12 relevant data. The terms that arise in the expanded search will be included in the final report.  
13  
14  
15

### 16 17 **Published Literature Search**

18  
19 Using the Ovid program, an electronic database search will be conducted on MEDLINE,  
20 EMBASE, Pubmed, and the Cochrane Library using the aforementioned search strategy. These  
21 searches will be filtered to only include studies with human subjects. An example of the search  
22 in MEDLINE can be found in Supplementary File 2.  
23  
24

### 25 26 **Inclusion/Exclusion Criteria**

27  
28 Only fetuses with a structural congenital anomaly as listed in search string 1 will be included.  
29 Studies focusing on non-structural congenital anomalies will be excluded. Furthermore, all  
30 studies must focus on participants from LMICs; research focusing on high-income countries  
31 (HICs) will be excluded. Finally, studies that concentrate on antenatal diagnosis will be included,  
32 while studies focusing on postnatal diagnosis will be excluded. Included studies will be limited  
33 to the English language.  
34  
35

### 36 37 **Study Design**

38  
39 No filters will be applied to study types; thus, all forms of evidence-based research will be  
40 included. This includes, but is not limited to, systematic reviews and meta-analyses, randomized  
41 controlled trials, prospective and retrospective cohort studies, case-control studies, and case  
42 series/reports. Qualitative studies and WHO/government policy documents and guidelines will  
43 be included to provide insight into the current practices regarding the provision of antenatal  
44 ultrasound and to help contextualize the use of antenatal ultrasound in LMICs.  
45  
46

### 47 48 **Methodological Quality**

49  
50 To assess the methodological quality of the studies, the researchers will use the Cochrane Risk  
51 of Bias for Non-Randomized Studies of Intervention (ROBINS-I) and the revised tool to assess  
52 Risk of Bias in randomized trials (RoB 2.0) [13, 14]. These tools are widely used for critically  
53 appraising study methodology. For the purposes of this study, these tools will be used as a  
54 means of quality assessment, rather than as an inclusion/exclusion determinant. Two  
55  
56  
57  
58  
59  
60

1  
2  
3 independent reviewers will score the articles according to the ROBINS-I and RoB 2.0 criteria and  
4 any discrepancies will be assessed by the research team until unanimity is reached.  
5

### 6 7 **Study Screening**

8  
9 References from the search results will be added to EndNote X8 and duplicates will be  
10 removed. The articles will then be uploaded to Covidence for the screening process. Two  
11 reviewers will screen the titles and abstracts in duplicate, removing any articles that do not  
12 meet the inclusion criteria. The remaining articles will be assessed by two reviewers  
13 independently in full-text and any remaining articles that do not adhere to the study criteria will  
14 be removed.  
15  
16

### 17 18 **Data Extraction**

19  
20 Data extraction will be undertaken by the principal investigator. The following data will be  
21 extracted: place of study, study type, publication status, study population, patient cohort,  
22 gestational age at time of diagnosis, type of anomaly, type of ultrasound, percent receiving  
23 antenatal ultrasound, percent with any anomaly detected, percent with accurate antenatal  
24 diagnosis, reported sensitivity and specificity of antenatal ultrasound, training of ultrasound  
25 technician, referral rate for further antenatal care, referral rate to a tertiary pediatric surgery  
26 center, termination rate, mortality rate and complications as per the Clavien-Dindo  
27 classification. The following data will be collected regarding antenatal ultrasound policies: date,  
28 country/region, governing body, population coverage, intervention(s) and outcomes as detailed  
29 above.  
30  
31  
32

### 33 34 **Data Synthesis**

35  
36 Descriptive statistics and narrative synthesis will be utilized. The primary outcomes are the  
37 availability and effectiveness of ultrasound for the antenatal diagnosis of structural congenital  
38 anomalies in LMICs. The secondary outcomes are the effects of antenatal ultrasound diagnosis  
39 on neonatal morbidity and mortality, termination rates, and referral rates for further antenatal  
40 care. Data will be presented according to the following categories: availability of antenatal  
41 ultrasound, effectiveness of antenatal ultrasound, training of personnel performing ultrasound  
42 examination, secondary outcomes and antenatal ultrasound policies in LMICs. Information  
43 relating to the provision of antenatal ultrasound in isolation or as part of a perinatal care  
44 program will be noted, as will any details regarding private/government provisions of such  
45 services.  
46  
47  
48

49  
50 Based on the authors' experience, it is unlikely that a meta-analysis will be feasible due to  
51 limited availability of data. However, if there is appropriate data, a meta-analysis will be  
52 undertaken in duplicate by two independent authors and discrepancies resolved amongst the  
53 wider authorship. Appropriate data will be defined as: two or more sufficiently homogeneous  
54 studies comparing morbidity and/ or mortality between one group who has received antenatal  
55 ultrasound and another who has not. In addition, a meta-analysis may be undertaken if two or  
56  
57  
58  
59  
60

1  
2  
3 more studies have compared an intervention to improve antenatal ultrasound coverage or  
4 detection rates in a population. Meta-analysis will be undertaken in Stata and results presented  
5 using a forest plot. If there are over 10 studies in the meta-analysis a funnel plot will be  
6 undertaken to assess publication bias and a Galbraith plot to investigate heterogeneity in effect  
7 sizes. The quality of evidence will be assessed following GRADE guidelines.  
8  
9

## 10 **Limitations**

11  
12  
13 It is beyond the feasibility of this study to include articles in languages other than English. The  
14 researchers acknowledge this is a limitation. In order to aid interpretation of the systematic  
15 review findings, the number of studies included and excluded due to non-English language will  
16 be reported and depicted geographically in the final report.  
17  
18

19 Furthermore, it is important to note that antenatal ultrasound has further diagnostic  
20 capabilities, such as detecting abnormal growth or improper placental position. This systematic  
21 review will only focus on the detection of structural congenital anomalies, however, it may be  
22 prudent to consider other uses of antenatal ultrasound in further investigations.  
23  
24

## 25 **DISCUSSION**

26  
27  
28 The discrepancy in mortality due to congenital anomalies between HICs and LMICs is quite  
29 substantial. For instance, the survival rate for infants with gastroschisis in HICs is above 95%,  
30 while in many LMICs, there are few survivors of the condition [10]. This study aims to  
31 investigate the use of antenatal ultrasound to diagnose congenital anomalies in LMICs. Further,  
32 this study will examine the current policies and programs in place for antenatal ultrasound.  
33 Gaining a better understanding of the current policies and practices which increase the  
34 antenatal diagnosis of structural congenital anomalies may help to determine the most  
35 effective standards of practice. Increasing the early diagnosis of structural congenital anomalies  
36 may help to reduce the morbidity and mortality rates of congenital anomalies in LMICs. Many  
37 complications that arise from certain structural congenital anomalies could be avoided if the  
38 condition is detected antenatally and steps are taken to ensure safe delivery, such as planning  
39 the birth at a tertiary healthcare facility. This study may provide crucial information regarding  
40 the effects of antenatal ultrasound on morbidity and mortality rates from congenital anomalies  
41 in LMICs. This in turn can inform future studies aimed at improving availability and quality of  
42 antenatal ultrasound in LMICs to ultimately improve the health outcomes of infants born with  
43 these conditions.  
44  
45  
46  
47  
48  
49

## 50 **ETHICS AND DISSEMINATION**

51  
52  
53 The researchers of this study will be conducting a secondary analysis. No new data will be  
54 collected and there will be no direct interaction with participants. Therefore, it is not necessary  
55 to acquire ethical approval prior to conducting this review. Following data collection and  
56  
57  
58  
59  
60

analysis, the results will be submitted to a peer-reviewed scientific journal for publication. The results will also be shared in conferences pertaining to infant health, global health and global surgery.

## References

1. Apfeld, J.C., et al., *Infant, maternal, and geographic factors influencing gastroschisis related mortality in Zimbabwe*. *Surgery*, 2015. **158**(6): p. 1475-80.
2. Sitkin, N.A., et al., *Congenital anomalies in low- and middle-income countries: the unborn child of global surgery*. *World J Surg*, 2015. **39**(1): p. 36-40.
3. Collaborators, G.B.D.C.M., *Global, regional, national, and selected subnational levels of stillbirths, neonatal, infant, and under-5 mortality, 1980-2015: a systematic analysis for the Global Burden of Disease Study 2015*. *Lancet*, 2016. **388**(10053): p. 1725-1774.
4. Wu, V.K., D. Poenaru, and M.J. Poley, *Burden of surgical congenital anomalies in Kenya: a population-based study*. *J Trop Pediatr*, 2013. **59**(3): p. 195-202.
5. Ford, K., et al., *Gastroschisis: Bellwether for neonatal surgery capacity in low resource settings?* *J Pediatr Surg*, 2016. **51**(8): p. 1262-7.
6. Mashuda, F., et al., *Pattern and factors associated with congenital anomalies among young infants admitted at Bugando medical centre, Mwanza, Tanzania*. *BMC Res Notes*, 2014. **7**: p. 195.
7. *Congenital Anomalies*. 2016; Available from:  
<http://www.who.int/mediacentre/factsheets/fs370/en/>.
8. *What are the types of birth defects?* 2017; Available from:  
<https://www.nichd.nih.gov/health/topics/birthdefects/conditioninfo/types>.

- 1  
2  
3 9. Payne, N.R., et al., *Predicting the Outcome of Newborns with Gastroschisis*. Journal of  
4  
5 pediatric surgery, 2009. **44**(5): p. 918-923.  
6  
7
- 8 10. Badrinath, R., et al., *Outcomes and unmet need for neonatal surgery in a resource-*  
9  
10 *limited environment: estimates of global health disparities from Kampala, Uganda*. J  
11  
12 *Pediatr Surg*, 2014. **49**(12): p. 1825-30.  
13  
14
- 15 11. Moher, D., et al., *Preferred reporting items for systematic review and meta-analysis*  
16  
17 *protocols (PRISMA-P) 2015 statement*. *Syst Rev*, 2015. **4**: p. 1.  
18  
19
- 20 12. Shamseer, L., et al., *Preferred reporting items for systematic review and meta-analysis*  
21  
22 *protocols (PRISMA-P) 2015: elaboration and explanation*. *BMJ*, 2015. **350**: p. g7647.  
23  
24
- 25 13. Higgins, J., et al., *Appraising the risk of bias in randomized trials using the Cochrane Risk*  
26  
27 *of Bias Tool*. *Cochrane Database of Systematic Reviews*, 2016. **10**(Suppl 1).  
28  
29
- 30 14. Sterne, J.A., et al., *ROBINS-I: a tool for assessing risk of bias in non-randomised studies of*  
31  
32 *interventions*. *BMJ*, 2016. **355**: p. i4919.  
33  
34  
35  
36  
37  
38  
39  
40  
41  
42  
43  
44  
45  
46  
47  
48  
49  
50  
51  
52  
53  
54  
55  
56  
57  
58  
59  
60

## Acknowledgements

We would like to thank the library services at King's College London for help with the systematic review process.

## Contributors

NW conceived the idea for this study. All authors devised the study design. SG drafted the protocol with significant contributions from NW and AK. SG and SSB will perform the literature review and SG will draft the results.

## Funding

NW receives funding from the Wellcome Trust to undertake a Clinical PhD in Global Health at King's Centre for Global Health and Health Partnerships, King's College London.

## Competing Interests

The authors have no competing interests to declare.

## Supplementary File 1

## Investigating the Use of Ultrasonography for the Antenatal Diagnosis of Structural Congenital Anomalies in Low- and Middle-Income Countries: A Systematic Review Protocol

## PRISMA-P (Preferred Reporting Items for Systematic review and Meta-Analysis Protocols) 2015 Checklist

| Section and topic                 | Item No | Checklist item                                                                                                                                                                                                                | Section Where Addressed in Protocol           |
|-----------------------------------|---------|-------------------------------------------------------------------------------------------------------------------------------------------------------------------------------------------------------------------------------|-----------------------------------------------|
| <b>Administrative information</b> |         |                                                                                                                                                                                                                               |                                               |
| Title:                            |         |                                                                                                                                                                                                                               |                                               |
| Identification                    | 1a      | Identify the report as a protocol of a systematic review                                                                                                                                                                      | Title Page                                    |
| Update                            | 1b      | If the protocol is for an update of a previous systematic review, identify as such                                                                                                                                            | N/A                                           |
| Registration                      | 2       | If registered, provide the name of the registry (such as PROSPERO) and registration number                                                                                                                                    | Title Page                                    |
| Authors:                          |         |                                                                                                                                                                                                                               |                                               |
| Contact                           | 3a      | Provide name, institutional affiliation, e-mail address of all protocol authors; provide physical mailing address of corresponding author                                                                                     | Title Page                                    |
| Contributions                     | 3b      | Describe contributions of protocol authors and identify the guarantor of the review                                                                                                                                           | Contributors                                  |
| Amendments                        | 4       | If the protocol represents an amendment of a previously completed or published protocol, identify as such and list changes; otherwise, state plan for documenting important protocol amendments                               | Methods and Analysis                          |
| Support:                          |         |                                                                                                                                                                                                                               |                                               |
| Sources                           | 5a      | Indicate sources of financial or other support for the review                                                                                                                                                                 | Funding                                       |
| Sponsor                           | 5b      | Provide name for the review funder and/or sponsor                                                                                                                                                                             | Funding                                       |
| Role of sponsor or funder         | 5c      | Describe roles of funder(s), sponsor(s), and/or institution(s), if any, in developing the protocol                                                                                                                            | Funding                                       |
| <b>Introduction</b>               |         |                                                                                                                                                                                                                               |                                               |
| Rationale                         | 6       | Describe the rationale for the review in the context of what is already known                                                                                                                                                 | Introduction                                  |
| Objectives                        | 7       | Provide an explicit statement of the question(s) the review will address with reference to participants, interventions, comparators, and outcomes (PICO)                                                                      | Aim; Objectives                               |
| <b>Methods</b>                    |         |                                                                                                                                                                                                                               |                                               |
| Eligibility criteria              | 8       | Specify the study characteristics (such as PICO, study design, setting, time frame) and report characteristics (such as years considered, language, publication status) to be used as criteria for eligibility for the review | Search Strategy; Inclusion/Exclusion Criteria |
| Information sources               | 9       | Describe all intended information sources (such as electronic databases, contact with study authors, trial registers or other grey literature sources) with planned dates of coverage                                         | Published Literature Search                   |



| Section and topic                  | Item No | Checklist item                                                                                                                                                                                                                                   | Section Where Addressed in Protocol                |
|------------------------------------|---------|--------------------------------------------------------------------------------------------------------------------------------------------------------------------------------------------------------------------------------------------------|----------------------------------------------------|
| Search strategy                    | 10      | Present draft of search strategy to be used for at least one electronic database, including planned limits, such that it could be repeated                                                                                                       | Search Strategy; Table 1; Supplementary Document 2 |
| Study records:                     |         |                                                                                                                                                                                                                                                  |                                                    |
| Data management                    | 11a     | Describe the mechanism(s) that will be used to manage records and data throughout the review                                                                                                                                                     | Study Screening; Data Extraction                   |
| Selection process                  | 11b     | State the process that will be used for selecting studies (such as two independent reviewers) through each phase of the review (that is, screening, eligibility and inclusion in meta-analysis)                                                  | Study Screening                                    |
| Data collection process            | 11c     | Describe planned method of extracting data from reports (such as piloting forms, done independently, in duplicate), any processes for obtaining and confirming data from investigators                                                           | Data Extraction                                    |
| Data items                         | 12      | List and define all variables for which data will be sought (such as PICO items, funding sources), any pre-planned data assumptions and simplifications                                                                                          | Data Extraction                                    |
| Outcomes and prioritization        | 13      | List and define all outcomes for which data will be sought, including prioritization of main and additional outcomes, with rationale                                                                                                             | Data Extraction                                    |
| Risk of bias in individual studies | 14      | Describe anticipated methods for assessing risk of bias of individual studies, including whether this will be done at the outcome or study level, or both; state how this information will be used in data synthesis                             | Methodological Quality                             |
| Data synthesis                     | 15a     | Describe criteria under which study data will be quantitatively synthesized                                                                                                                                                                      | Data Synthesis                                     |
|                                    | 15b     | If data are appropriate for quantitative synthesis, describe planned summary measures, methods of handling data and methods of combining data from studies, including any planned exploration of consistency (such as $I^2$ , Kendall's $\tau$ ) | Data Synthesis                                     |
|                                    | 15c     | Describe any proposed additional analyses (such as sensitivity or subgroup analyses, meta-regression)                                                                                                                                            | N/A                                                |
|                                    | 15d     | If quantitative synthesis is not appropriate, describe the type of summary planned                                                                                                                                                               | Data Synthesis                                     |
| Meta-bias(es)                      | 16      | Specify any planned assessment of meta-bias(es) (such as publication bias across studies, selective reporting within studies)                                                                                                                    | Data Synthesis                                     |
| Confidence in cumulative evidence  | 17      | Describe how the strength of the body of evidence will be assessed (such as GRADE)                                                                                                                                                               | Data Synthesis                                     |

From: Shamseer L, Moher D, Clarke M, Ghersi D, Liberati A, Petticrew M, Shekelle P, Stewart L, PRISMA-P Group. Preferred reporting items for systematic review and meta-analysis protocols (PRISMA-P) 2015: elaboration and explanation. *BMJ*. 2015 Jan 2;349(jan02 1):g7647.

## Supplementary File 2

### Investigating the Use of Ultrasonography for the Antenatal Diagnosis of Structural Congenital Anomalies in Low- and Middle-Income Countries: A Systematic Review Protocol

Database: Ovid MEDLINE(R) Epub Ahead of Print, In-Process & Other Non-Indexed Citations, Ovid MEDLINE(R) Daily, Ovid MEDLINE and Versions(R) <1946 to June 27, 2018>

#### Search Strategy:

| No. | Search Terms                                                                                                                                                                                                                                                                        | Results |
|-----|-------------------------------------------------------------------------------------------------------------------------------------------------------------------------------------------------------------------------------------------------------------------------------------|---------|
| 1   | exp Congenital Abnormalities/ or congenital anomal*.mp.                                                                                                                                                                                                                             | 559922  |
| 2   | exp Congenital Abnormalities/ or Congenital Abnormal*.mp.                                                                                                                                                                                                                           | 555311  |
| 3   | Congenital Malformation*.mp.                                                                                                                                                                                                                                                        | 13826   |
| 4   | Fetal Malformation*.mp.                                                                                                                                                                                                                                                             | 1917    |
| 5   | Birth Defect*.mp.                                                                                                                                                                                                                                                                   | 9122    |
| 6   | Anencephaly.mp. or exp ANENCEPHALY/                                                                                                                                                                                                                                                 | 3875    |
| 7   | Conjoined Twins.mp. or exp Twins, Conjoined/                                                                                                                                                                                                                                        | 2022    |
| 8   | exp Heart Defects, Congenital/ or Congenital Heart Defect*.mp.                                                                                                                                                                                                                      | 142854  |
| 9   | Anorectal Malformation*.mp.                                                                                                                                                                                                                                                         | 1896    |
| 10  | Anal Stenosis.mp.                                                                                                                                                                                                                                                                   | 389     |
| 11  | Anal Atresia.mp. or exp Anus, Imperforate/                                                                                                                                                                                                                                          | 2815    |
| 12  | Imperforate Anus.mp. or exp Anus, Imperforate/                                                                                                                                                                                                                                      | 2992    |
| 13  | Biliary atresia.mp. or exp Biliary Atresia/                                                                                                                                                                                                                                         | 4482    |
| 14  | exp Choledochal Cyst/ or Choledochal Cyst*.mp.                                                                                                                                                                                                                                      | 2825    |
| 15  | exp Diaphragmatic Eventration/ or Diaphragmatic Eventration*.mp.                                                                                                                                                                                                                    | 943     |
| 16  | Esophageal Atresia.mp. or exp Esophageal Atresia/                                                                                                                                                                                                                                   | 4173    |
| 17  | exp Tracheoesophageal Fistula/ or Tracheo-?esophageal fistula*.mp.                                                                                                                                                                                                                  | 3676    |
| 18  | Intestinal Atresia.mp. or exp Intestinal Atresia/                                                                                                                                                                                                                                   | 2301    |
| 19  | Duodenal atresia.mp.                                                                                                                                                                                                                                                                | 839     |
| 20  | Colonic Atresia.mp.                                                                                                                                                                                                                                                                 | 152     |
| 21  | Malrotation.mp.                                                                                                                                                                                                                                                                     | 2393    |
| 22  | Apple peel syndrome.mp.                                                                                                                                                                                                                                                             | 16      |
| 23  | exp Hernias, Diaphragmatic, Congenital/ or congenital diaphragmatic hernia*.mp.                                                                                                                                                                                                     | 5530    |
| 24  | Gastroschisis.mp. or exp GASTROSCHISIS/                                                                                                                                                                                                                                             | 2313    |
| 25  | Abdominal Wall Defect*.mp.                                                                                                                                                                                                                                                          | 2009    |
| 26  | Exomphalos.mp. or exp Hernia, Umbilical/                                                                                                                                                                                                                                            | 3740    |
| 27  | Omphalocele.mp. or exp Hernia, Umbilical/                                                                                                                                                                                                                                           | 4242    |
| 28  | Congenital Limb Deformities.mp. or exp Limb Deformities, Congenital/                                                                                                                                                                                                                | 22483   |
| 29  | exp Neural Tube Defects/ or Neural Tube Defect*.mp.                                                                                                                                                                                                                                 | 29051   |
| 30  | exp Bronchogenic Cyst/ or Bronchogenic Cyst*.mp.                                                                                                                                                                                                                                    | 1810    |
| 31  | exp Bronchopulmonary Sequestration/ or Bronchopulmonary sequestration*.mp.                                                                                                                                                                                                          | 2022    |
| 32  | exp "Cystic Adenomatoid Malformation of Lung, Congenital"/ or Congenital Cystic adenomatoid malformation of lung*.mp.                                                                                                                                                               | 874     |
| 33  | Renal Anomal*.mp.                                                                                                                                                                                                                                                                   | 1185    |
| 34  | exp Urogenital Abnormalities/ or Genito-urinary Anomalies.mp.                                                                                                                                                                                                                       | 57735   |
| 35  | exp Maxillofacial Abnormalities/ or Maxillofacial Abnormalit*.mp.                                                                                                                                                                                                                   | 28265   |
| 36  | exp Mouth Abnormalities/ or Mouth Abnormalit*.mp.                                                                                                                                                                                                                                   | 24459   |
| 37  | Umbilical Hernia.mp. or exp Hernia, Umbilical/                                                                                                                                                                                                                                      | 4200    |
| 38  | Hirschsprung disease.mp. or exp Hirschsprung Disease/                                                                                                                                                                                                                               | 4567    |
| 39  | exp Megacolon/ or Ganglionic Megacolon.mp.                                                                                                                                                                                                                                          | 7053    |
| 40  | Rectosigmoid aganglionosis.mp.                                                                                                                                                                                                                                                      | 15      |
| 41  | Colonic Aganglionosis.mp.                                                                                                                                                                                                                                                           | 311     |
| 42  | Intestinal Aganglionosis.mp.                                                                                                                                                                                                                                                        | 190     |
| 43  | Volvulus.mp. or exp Intestinal Volvulus/                                                                                                                                                                                                                                            | 8927    |
| 44  | LMICs.mp.                                                                                                                                                                                                                                                                           | 2001    |
| 45  | (low- and middle-income countr*).mp. [mp=title, abstract, original title, name of substance word, subject heading word, floating sub-heading word, keyword heading word, protocol supplementary concept word, rare disease supplementary concept word, unique identifier, synonyms] | 10910   |
| 46  | Low-resource setting*.mp.                                                                                                                                                                                                                                                           | 2719    |

|     |                                                                                                                                                                                                                                                                             |        |
|-----|-----------------------------------------------------------------------------------------------------------------------------------------------------------------------------------------------------------------------------------------------------------------------------|--------|
| 47  | Underdeveloped Countries.mp.                                                                                                                                                                                                                                                | 817    |
| 48  | low-income countries.mp.                                                                                                                                                                                                                                                    | 4707   |
| 49  | exp Developing Countries/ or Developing countr*.mp.                                                                                                                                                                                                                         | 115302 |
| 50  | middle-income countries.mp.                                                                                                                                                                                                                                                 | 11136  |
| 51  | limited resource setting*.mp.                                                                                                                                                                                                                                               | 253    |
| 52  | Africa South of the Sahara.mp. or exp "Africa South of the Sahara"/                                                                                                                                                                                                         | 184102 |
| 53  | Sub-Saharan Africa.mp. or exp "Africa South of the Sahara"/                                                                                                                                                                                                                 | 190396 |
| 54  | Less Resourced communities.mp.                                                                                                                                                                                                                                              | 1      |
| 55  | Afghanistan.mp. or exp AFGHANISTAN/                                                                                                                                                                                                                                         | 6065   |
| 56  | Albania.mp. or exp ALBANIA/                                                                                                                                                                                                                                                 | 1182   |
| 57  | Algeria.mp. or exp ALGERIA/                                                                                                                                                                                                                                                 | 3621   |
| 58  | American Samoa.mp.                                                                                                                                                                                                                                                          | 354    |
| 59  | Angola.mp. or exp ANGOLA/                                                                                                                                                                                                                                                   | 1403   |
| 60  | Argentina.mp. or exp ARGENTINA/                                                                                                                                                                                                                                             | 19610  |
| 61  | Armenia.mp. or exp ARMENIA/                                                                                                                                                                                                                                                 | 1676   |
| 62  | Azerbaijan.mp. or exp AZERBAIJAN/                                                                                                                                                                                                                                           | 1765   |
| 63  | Bangladesh.mp. or exp BANGLADESH/                                                                                                                                                                                                                                           | 12907  |
| 64  | Belarus.mp. or exp "Republic of Belarus"/                                                                                                                                                                                                                                   | 2553   |
| 65  | Belize.mp. or exp BELIZE/                                                                                                                                                                                                                                                   | 868    |
| 66  | Benin.mp. or exp BENIN/                                                                                                                                                                                                                                                     | 3441   |
| 67  | exp BHUTAN/ or Bhutan.mp.                                                                                                                                                                                                                                                   | 628    |
| 68  | Bolivia.mp. or exp BOLIVIA/                                                                                                                                                                                                                                                 | 3594   |
| 69  | (Bosnia and Herzegovina).mp. [mp=title, abstract, original title, name of substance word, subject heading word, floating sub-heading word, keyword heading word, protocol supplementary concept word, rare disease supplementary concept word, unique identifier, synonyms] | 2477   |
| 70  | Botswana.mp. or exp BOTSWANA/                                                                                                                                                                                                                                               | 2247   |
| 71  | Brazil.mp. or exp BRAZIL/                                                                                                                                                                                                                                                   | 101919 |
| 72  | Bulgaria.mp. or exp BULGARIA/                                                                                                                                                                                                                                               | 7554   |
| 73  | Burkina Faso.mp. or exp Burkina Faso/                                                                                                                                                                                                                                       | 3904   |
| 74  | Burundi.mp. or exp BURUNDI/                                                                                                                                                                                                                                                 | 871    |
| 75  | Cabo Verde.mp. or exp Cabo Verde/                                                                                                                                                                                                                                           | 211    |
| 76  | Cambodia.mp. or exp CAMBODIA/                                                                                                                                                                                                                                               | 4102   |
| 77  | Cameroon.mp. or exp CAMEROON/                                                                                                                                                                                                                                               | 6804   |
| 78  | Central African Republic.mp. or exp Central African Republic/                                                                                                                                                                                                               | 1096   |
| 79  | Chad.mp. or exp CHAD/                                                                                                                                                                                                                                                       | 1144   |
| 80  | China.mp. or exp CHINA/                                                                                                                                                                                                                                                     | 205799 |
| 81  | Colombia.mp. or exp COLOMBIA/                                                                                                                                                                                                                                               | 12533  |
| 82  | Comoros.mp. or exp COMOROS/                                                                                                                                                                                                                                                 | 427    |
| 83  | Democratic Republic of the Congo.mp. or exp "Democratic Republic of the Congo"/                                                                                                                                                                                             | 4506   |
| 84  | exp "Democratic Republic of the Congo"/ or DRC.mp.                                                                                                                                                                                                                          | 4827   |
| 85  | Republic of the Congo.mp. or exp Congo/                                                                                                                                                                                                                                     | 6176   |
| 86  | Costa Rica.mp. or exp Costa Rica/                                                                                                                                                                                                                                           | 5088   |
| 87  | Cote d'Ivoire.mp. or exp Cote d'Ivoire/                                                                                                                                                                                                                                     | 3527   |
| 88  | Ivory Coast.mp. or exp Cote d'Ivoire/                                                                                                                                                                                                                                       | 3432   |
| 89  | Croatia.mp. or exp CROATIA/                                                                                                                                                                                                                                                 | 8261   |
| 90  | Cuba.mp. or exp CUBA/                                                                                                                                                                                                                                                       | 6343   |
| 91  | Djibouti.mp. or exp DJIBOUTI/                                                                                                                                                                                                                                               | 372    |
| 92  | Dominica.mp. or exp DOMINICA/                                                                                                                                                                                                                                               | 430    |
| 93  | Dominican Republic.mp. or exp Dominican Republic/                                                                                                                                                                                                                           | 2128   |
| 94  | Ecuador.mp. or exp ECUADOR/                                                                                                                                                                                                                                                 | 4722   |
| 95  | exp EGYPT/ or Egypt.mp.                                                                                                                                                                                                                                                     | 18702  |
| 96  | El Salvador.mp. or exp El Salvador/                                                                                                                                                                                                                                         | 1319   |
| 97  | Equatorial Guinea.mp. or exp Equatorial Guinea/                                                                                                                                                                                                                             | 419    |
| 98  | Eritrea.mp. or exp ERITREA/                                                                                                                                                                                                                                                 | 518    |
| 99  | Ethiopia.mp. or exp ETHIOPIA/                                                                                                                                                                                                                                               | 13354  |
| 100 | Fiji.mp. or exp FIJI/                                                                                                                                                                                                                                                       | 1620   |
| 101 | Gabon.mp. or exp GABON/                                                                                                                                                                                                                                                     | 1925   |
| 102 | exp GAMBIA/ or Gambia.mp.                                                                                                                                                                                                                                                   | 2958   |
| 103 | exp "GEORGIA (REPUBLIC)"/ or exp GEORGIA/ or Georgia.mp.                                                                                                                                                                                                                    | 15842  |
| 104 | Ghana.mp. or exp GHANA/                                                                                                                                                                                                                                                     | 9432   |
| 105 | Grenada.mp. or exp GRENADA/                                                                                                                                                                                                                                                 | 308    |
| 106 | Guatemala.mp. or exp GUATEMALA/                                                                                                                                                                                                                                             | 3907   |
| 107 | Guinea.mp. or exp GUINEA-BISSAU/ or exp EQUATORIAL GUINEA/ or exp GUINEA/ or exp PAPUA NEW GUINEA/ or exp NEW GUINEA/                                                                                                                                                       | 160074 |
| 108 | Guyana.mp. or exp GUYANA/                                                                                                                                                                                                                                                   | 1136   |
| 109 | Haiti.mp. or exp HAITI/                                                                                                                                                                                                                                                     | 3707   |
| 110 | Honduras.mp. or exp HONDURAS/                                                                                                                                                                                                                                               | 1736   |

|     |                                                                                                                                                                                                                                                                                       |        |
|-----|---------------------------------------------------------------------------------------------------------------------------------------------------------------------------------------------------------------------------------------------------------------------------------------|--------|
| 111 | India.mp. or exp INDIA/                                                                                                                                                                                                                                                               | 129215 |
| 112 | Indonesia.mp. or exp INDONESIA/                                                                                                                                                                                                                                                       | 13107  |
| 113 | exp Iran/ or Islamic Republic of Iran.mp.                                                                                                                                                                                                                                             | 21280  |
| 114 | exp IRAQ/ or Iraq.mp.                                                                                                                                                                                                                                                                 | 9035   |
| 115 | Jamaica.mp. or exp JAMAICA/                                                                                                                                                                                                                                                           | 4427   |
| 116 | Jordan.mp. or exp JORDAN/                                                                                                                                                                                                                                                             | 6040   |
| 117 | Kazakhstan.mp. or exp KAZAKHSTAN/                                                                                                                                                                                                                                                     | 3153   |
| 118 | Kenya.mp. or exp KENYA/                                                                                                                                                                                                                                                               | 18798  |
| 119 | Kiribati.mp. or exp Micronesia/                                                                                                                                                                                                                                                       | 1934   |
| 120 | Democratic People's Republic of Korea.mp. or exp "Democratic People's Republic of Korea"/                                                                                                                                                                                             | 246    |
| 121 | Kosovo.mp. or exp KOSOVO/                                                                                                                                                                                                                                                             | 840    |
| 122 | Kyrgyz Republic.mp. or exp Kyrgyzstan/                                                                                                                                                                                                                                                | 1225   |
| 123 | exp Laos/ or Lao PDR.mp.                                                                                                                                                                                                                                                              | 1876   |
| 124 | Laos.mp. or exp LAOS/                                                                                                                                                                                                                                                                 | 2431   |
| 125 | Lebanon.mp. or exp LEBANON/                                                                                                                                                                                                                                                           | 5011   |
| 126 | Lesotho.mp. or exp LESOTHO/                                                                                                                                                                                                                                                           | 645    |
| 127 | Liberia.mp. or exp LIBERIA/                                                                                                                                                                                                                                                           | 1667   |
| 128 | Libya.mp. or exp LIBYA/                                                                                                                                                                                                                                                               | 1554   |
| 129 | Macedonia Republic.mp. or exp "Macedonia (Republic)"/                                                                                                                                                                                                                                 | 475    |
| 130 | Madagascar.mp. or exp MADAGASCAR/                                                                                                                                                                                                                                                     | 4734   |
| 131 | Malawi.mp. or exp MALAWI/                                                                                                                                                                                                                                                             | 6317   |
| 132 | Malaysia.mp. or exp MALAYSIA/                                                                                                                                                                                                                                                         | 18390  |
| 133 | Maldives.mp. or exp Indian Ocean Islands/                                                                                                                                                                                                                                             | 10595  |
| 134 | Mali.mp. or exp MALI/                                                                                                                                                                                                                                                                 | 3511   |
| 135 | Marshall Islands.mp. or exp Micronesia/                                                                                                                                                                                                                                               | 1959   |
| 136 | Mauritania.mp. or exp MAURITANIA/                                                                                                                                                                                                                                                     | 626    |
| 137 | Mauritius.mp. or exp MAURITIUS/                                                                                                                                                                                                                                                       | 953    |
| 138 | exp MEXICO/ or Mexico.mp.                                                                                                                                                                                                                                                             | 53282  |
| 139 | Micronesia.mp. or exp MICRONESIA/                                                                                                                                                                                                                                                     | 2243   |
| 140 | Moldova.mp. or exp MOLDOVA/                                                                                                                                                                                                                                                           | 920    |
| 141 | Mongolia.mp. or exp MONGOLIA/                                                                                                                                                                                                                                                         | 3809   |
| 142 | Montenegro.mp. or exp MONTENEGRO/                                                                                                                                                                                                                                                     | 749    |
| 143 | Morocco.mp. or exp MOROCCO/                                                                                                                                                                                                                                                           | 6855   |
| 144 | Mozambique.mp. or exp MOZAMBIQUE/                                                                                                                                                                                                                                                     | 3236   |
| 145 | Myanmar.mp. or exp MYANMAR/                                                                                                                                                                                                                                                           | 3198   |
| 146 | Namibia.mp. or exp NAMIBIA                                                                                                                                                                                                                                                            | 1502   |
| 147 | Nauru.mp. or exp Micronesia/                                                                                                                                                                                                                                                          | 1921   |
| 148 | Nepal.mp. or exp NEPAL/                                                                                                                                                                                                                                                               | 9337   |
| 149 | Nicaragua.mp. or exp NICARAGUA/                                                                                                                                                                                                                                                       | 1949   |
| 150 | exp NIGER/ or Niger.mp.                                                                                                                                                                                                                                                               | 12299  |
| 151 | Nigeria.mp. or exp NIGERIA/                                                                                                                                                                                                                                                           | 32627  |
| 152 | Pakistan.mp. or exp PAKISTAN/                                                                                                                                                                                                                                                         | 20153  |
| 153 | exp PANAMA/ or Panama.mp.                                                                                                                                                                                                                                                             | 4265   |
| 154 | Papua New Guinea.mp. or exp Papua New Guinea/                                                                                                                                                                                                                                         | 5003   |
| 155 | Paraguay.mp. or exp PARAGUAY/                                                                                                                                                                                                                                                         | 1433   |
| 156 | Peru.mp. or exp PERU/                                                                                                                                                                                                                                                                 | 11249  |
| 157 | Philippines.mp. or exp PHILIPPINES/                                                                                                                                                                                                                                                   | 10698  |
| 158 | Romania.mp. or exp ROMANIA/                                                                                                                                                                                                                                                           | 11521  |
| 159 | exp Russia/ or Russian Federation.mp.                                                                                                                                                                                                                                                 | 51376  |
| 160 | Rwanda.mp. or exp RWANDA/                                                                                                                                                                                                                                                             | 2883   |
| 161 | exp AMERICAN SAMOA/ or Samoa.mp. or exp SAMOA/ or exp "INDEPENDENT STATE OF SAMOA"/                                                                                                                                                                                                   | 1024   |
| 162 | (Sao Tome and Principe).mp. [mp=title, abstract, original title, name of substance word, subject heading word, floating sub-heading word, keyword heading word, protocol supplementary concept word, rare disease supplementary concept word, unique identifier, synonyms]            | 135    |
| 163 | Senegal.mp. or exp SENEGAL/                                                                                                                                                                                                                                                           | 7067   |
| 164 | Serbia.mp. or exp SERBIA/                                                                                                                                                                                                                                                             | 4574   |
| 165 | Sierra Leone.mp. or exp Sierra Leone/                                                                                                                                                                                                                                                 | 2103   |
| 166 | Solomon Islands.mp. or exp Melanesia/                                                                                                                                                                                                                                                 | 6193   |
| 167 | Somalia.mp. or exp SOMALIA/                                                                                                                                                                                                                                                           | 1968   |
| 168 | Somaliland.mp.                                                                                                                                                                                                                                                                        | 136    |
| 169 | South Africa.mp. or exp South Africa/                                                                                                                                                                                                                                                 | 47075  |
| 170 | South Sudan.mp. or exp South Sudan/                                                                                                                                                                                                                                                   | 397    |
| 171 | Sri Lanka.mp. or exp Sri Lanka/                                                                                                                                                                                                                                                       | 7342   |
| 172 | Saint Lucia.mp. or exp Saint Lucia/                                                                                                                                                                                                                                                   | 114    |
| 173 | (Saint Vincent and the Grenadines).mp. [mp=title, abstract, original title, name of substance word, subject heading word, floating sub-heading word, keyword heading word, protocol supplementary concept word, rare disease supplementary concept word, unique identifier, synonyms] | 57     |

|     |                                                                                                                                                                                                                                                                                                                                                                                                                                                                                                                                                                                                                                                                                                                                                                                                                                                                                                                                                                                                                                                                                    |         |
|-----|------------------------------------------------------------------------------------------------------------------------------------------------------------------------------------------------------------------------------------------------------------------------------------------------------------------------------------------------------------------------------------------------------------------------------------------------------------------------------------------------------------------------------------------------------------------------------------------------------------------------------------------------------------------------------------------------------------------------------------------------------------------------------------------------------------------------------------------------------------------------------------------------------------------------------------------------------------------------------------------------------------------------------------------------------------------------------------|---------|
| 174 | exp SUDAN/ or Sudan.mp.                                                                                                                                                                                                                                                                                                                                                                                                                                                                                                                                                                                                                                                                                                                                                                                                                                                                                                                                                                                                                                                            | 8429    |
| 175 | Suriname.mp. or exp SURINAME/                                                                                                                                                                                                                                                                                                                                                                                                                                                                                                                                                                                                                                                                                                                                                                                                                                                                                                                                                                                                                                                      | 1098    |
| 176 | Swaziland.mp. or exp SWAZILAND/                                                                                                                                                                                                                                                                                                                                                                                                                                                                                                                                                                                                                                                                                                                                                                                                                                                                                                                                                                                                                                                    | 818     |
| 177 | Syrian Arab Republic.mp.                                                                                                                                                                                                                                                                                                                                                                                                                                                                                                                                                                                                                                                                                                                                                                                                                                                                                                                                                                                                                                                           | 73      |
| 178 | Syria.mp. or exp SYRIA/                                                                                                                                                                                                                                                                                                                                                                                                                                                                                                                                                                                                                                                                                                                                                                                                                                                                                                                                                                                                                                                            | 2407    |
| 179 | Tajikistan.mp. or exp TAJIKISTAN/                                                                                                                                                                                                                                                                                                                                                                                                                                                                                                                                                                                                                                                                                                                                                                                                                                                                                                                                                                                                                                                  | 910     |
| 180 | Tanzania.mp. or exp TANZANIA/                                                                                                                                                                                                                                                                                                                                                                                                                                                                                                                                                                                                                                                                                                                                                                                                                                                                                                                                                                                                                                                      | 12921   |
| 181 | Thailand.mp. or exp THAILAND/                                                                                                                                                                                                                                                                                                                                                                                                                                                                                                                                                                                                                                                                                                                                                                                                                                                                                                                                                                                                                                                      | 32186   |
| 182 | exp Timor-Leste/ or Timor-Leste.mp.                                                                                                                                                                                                                                                                                                                                                                                                                                                                                                                                                                                                                                                                                                                                                                                                                                                                                                                                                                                                                                                | 311     |
| 183 | East Timor.mp.                                                                                                                                                                                                                                                                                                                                                                                                                                                                                                                                                                                                                                                                                                                                                                                                                                                                                                                                                                                                                                                                     | 187     |
| 184 | Togo.mp. or exp TOGO/                                                                                                                                                                                                                                                                                                                                                                                                                                                                                                                                                                                                                                                                                                                                                                                                                                                                                                                                                                                                                                                              | 1491    |
| 185 | Tonga.mp. or exp TONGA/                                                                                                                                                                                                                                                                                                                                                                                                                                                                                                                                                                                                                                                                                                                                                                                                                                                                                                                                                                                                                                                            | 463     |
| 186 | Tunisia.mp. or exp TUNISIA/                                                                                                                                                                                                                                                                                                                                                                                                                                                                                                                                                                                                                                                                                                                                                                                                                                                                                                                                                                                                                                                        | 9057    |
| 187 | exp TURKEY/ or Turkey.mp.                                                                                                                                                                                                                                                                                                                                                                                                                                                                                                                                                                                                                                                                                                                                                                                                                                                                                                                                                                                                                                                          | 46898   |
| 188 | Turkmenistan.mp. or exp TURKMENISTAN/                                                                                                                                                                                                                                                                                                                                                                                                                                                                                                                                                                                                                                                                                                                                                                                                                                                                                                                                                                                                                                              | 717     |
| 189 | Tuvalu.mp. or exp Micronesia/                                                                                                                                                                                                                                                                                                                                                                                                                                                                                                                                                                                                                                                                                                                                                                                                                                                                                                                                                                                                                                                      | 1884    |
| 190 | Uganda.mp. or exp UGANDA/                                                                                                                                                                                                                                                                                                                                                                                                                                                                                                                                                                                                                                                                                                                                                                                                                                                                                                                                                                                                                                                          | 13956   |
| 191 | Ukraine.mp. or exp UKRAINE/                                                                                                                                                                                                                                                                                                                                                                                                                                                                                                                                                                                                                                                                                                                                                                                                                                                                                                                                                                                                                                                        | 16702   |
| 192 | Uzbekistan.mp. or exp UZBEKISTAN/                                                                                                                                                                                                                                                                                                                                                                                                                                                                                                                                                                                                                                                                                                                                                                                                                                                                                                                                                                                                                                                  | 2161    |
| 193 | Vanuatu.mp. or exp VANUATU/                                                                                                                                                                                                                                                                                                                                                                                                                                                                                                                                                                                                                                                                                                                                                                                                                                                                                                                                                                                                                                                        | 629     |
| 194 | Venezuela.mp. or exp VENEZUELA/                                                                                                                                                                                                                                                                                                                                                                                                                                                                                                                                                                                                                                                                                                                                                                                                                                                                                                                                                                                                                                                    | 6620    |
| 195 | exp VIETNAM/ or Vietnam.mp.                                                                                                                                                                                                                                                                                                                                                                                                                                                                                                                                                                                                                                                                                                                                                                                                                                                                                                                                                                                                                                                        | 15919   |
| 196 | (West Bank and Gaza).mp. [mp=title, abstract, original title, name of substance word, subject heading word, floating sub-heading word, keyword heading word, protocol supplementary concept word, rare disease supplementary concept word, unique identifier, synonyms]                                                                                                                                                                                                                                                                                                                                                                                                                                                                                                                                                                                                                                                                                                                                                                                                            | 194     |
| 197 | Republic of Yemen.mp. or exp Yemen/                                                                                                                                                                                                                                                                                                                                                                                                                                                                                                                                                                                                                                                                                                                                                                                                                                                                                                                                                                                                                                                | 1264    |
| 198 | Zambia.mp. or exp ZAMBIA/                                                                                                                                                                                                                                                                                                                                                                                                                                                                                                                                                                                                                                                                                                                                                                                                                                                                                                                                                                                                                                                          | 5404    |
| 199 | Zimbabwe.mp. or exp ZIMBABWE/                                                                                                                                                                                                                                                                                                                                                                                                                                                                                                                                                                                                                                                                                                                                                                                                                                                                                                                                                                                                                                                      | 6879    |
| 200 | Antenatal Diagnosis.mp.                                                                                                                                                                                                                                                                                                                                                                                                                                                                                                                                                                                                                                                                                                                                                                                                                                                                                                                                                                                                                                                            | 2383    |
| 201 | Prenatal Diagnosis.mp. or exp Prenatal Diagnosis/                                                                                                                                                                                                                                                                                                                                                                                                                                                                                                                                                                                                                                                                                                                                                                                                                                                                                                                                                                                                                                  | 74636   |
| 202 | Antenatal Screening.mp.                                                                                                                                                                                                                                                                                                                                                                                                                                                                                                                                                                                                                                                                                                                                                                                                                                                                                                                                                                                                                                                            | 1193    |
| 203 | Prenatal Screening.mp.                                                                                                                                                                                                                                                                                                                                                                                                                                                                                                                                                                                                                                                                                                                                                                                                                                                                                                                                                                                                                                                             | 2579    |
| 204 | Antenatal Ultrasound.mp.                                                                                                                                                                                                                                                                                                                                                                                                                                                                                                                                                                                                                                                                                                                                                                                                                                                                                                                                                                                                                                                           | 702     |
| 205 | Prenatal Ultrasound.mp.                                                                                                                                                                                                                                                                                                                                                                                                                                                                                                                                                                                                                                                                                                                                                                                                                                                                                                                                                                                                                                                            | 2203    |
| 206 | Antenatal Ultrasonography.mp.                                                                                                                                                                                                                                                                                                                                                                                                                                                                                                                                                                                                                                                                                                                                                                                                                                                                                                                                                                                                                                                      | 200     |
| 207 | Prenatal Ultrasonography.mp. or exp Ultrasonography, Prenatal/                                                                                                                                                                                                                                                                                                                                                                                                                                                                                                                                                                                                                                                                                                                                                                                                                                                                                                                                                                                                                     | 30427   |
| 208 | 1 or 2 or 3 or 4 or 5 or 6 or 7 or 8 or 9 or 10 or 11 or 12 or 13 or 14 or 15 or 16 or 17 or 18 or 19 or 20 or 21 or 22 or 23 or 24 or 25 or 26 or 27 or 28 or 29 or 30 or 31 or 32 or 33 or 34 or 35 or 36 or 37 or 38 or 39 or 40 or 41 or 42 or 43                                                                                                                                                                                                                                                                                                                                                                                                                                                                                                                                                                                                                                                                                                                                                                                                                              | 607001  |
| 209 | 44 or 45 or 46 or 47 or 48 or 49 or 50 or 51 or 52 or 53 or 54 or 55 or 56 or 57 or 58 or 59 or 60 or 61 or 62 or 63 or 64 or 65 or 66 or 67 or 68 or 69 or 70 or 71 or 72 or 73 or 74 or 75 or 76 or 77 or 78 or 79 or 80 or 81 or 82 or 83 or 84 or 85 or 86 or 87 or 88 or 89 or 90 or 91 or 92 or 93 or 94 or 95 or 96 or 97 or 98 or 99 or 100 or 101 or 102 or 103 or 104 or 105 or 106 or 107 or 108 or 109 or 110 or 111 or 112 or 113 or 114 or 115 or 116 or 117 or 118 or 119 or 120 or 121 or 122 or 123 or 124 or 125 or 126 or 127 or 128 or 129 or 130 or 131 or 132 or 133 or 134 or 135 or 136 or 137 or 138 or 139 or 140 or 141 or 142 or 143 or 144 or 145 or 146 or 147 or 148 or 149 or 150 or 151 or 152 or 153 or 154 or 155 or 156 or 157 or 158 or 159 or 160 or 161 or 162 or 163 or 164 or 165 or 166 or 167 or 168 or 169 or 170 or 171 or 172 or 173 or 174 or 175 or 176 or 177 or 178 or 179 or 180 or 181 or 182 or 183 or 184 or 185 or 186 or 187 or 188 or 189 or 190 or 191 or 192 or 193 or 194 or 195 or 196 or 197 or 198 or 199 (1385344) | 1385344 |
| 210 | 200 or 201 or 202 or 203 or 204 or 205 or 206 or 207                                                                                                                                                                                                                                                                                                                                                                                                                                                                                                                                                                                                                                                                                                                                                                                                                                                                                                                                                                                                                               | 77525   |
| 211 | 208 and 209 and 210                                                                                                                                                                                                                                                                                                                                                                                                                                                                                                                                                                                                                                                                                                                                                                                                                                                                                                                                                                                                                                                                | 896     |
