# Supplementary material for: Investigating the use of ultrasonography for the antenatal diagnosis of structural congenital anomalies in low-income and middle-income countries: systematic review protocol
Source: PubMed Central journal article supplement (PMC6782034; doi:10.1136/bmjpo-2019-000538), 2019-09-13
Supplement: bmjpo-2019-000538supp002.pdf [file bmjpo-2019-000538supp002.pdf]

## Supplementary File 2

## Investigating the Use of Ultrasonography for the Antenatal Diagnosis of Structural Congenital Anomalies in Low- and Middle-Income Countries: A Systematic Review Protocol

Database: Ovid MEDLINE(R) Epub Ahead of Print, In-Process & Other Non-Indexed Citations, Ovid MEDLINE(R) Daily, Ovid MEDLINE and Versions(R) <1946 to June 27, 2018>

## Search Strategy:

| No. | Search Terms                                                                                                                                                                                                                                                                        | Results |
|-----|-------------------------------------------------------------------------------------------------------------------------------------------------------------------------------------------------------------------------------------------------------------------------------------|---------|
| 1   | exp Congenital Abnormalities/ or congenital anomal*.mp.                                                                                                                                                                                                                             | 559922  |
| 2   | exp Congenital Abnormalities/ or Congenital Abnormal*.mp.                                                                                                                                                                                                                           | 555311  |
| 3   | Congenital Malformation*.mp.                                                                                                                                                                                                                                                        | 13826   |
| 4   | Fetal Malformation*.mp.                                                                                                                                                                                                                                                             | 1917    |
| 5   | Birth Defect*.mp.                                                                                                                                                                                                                                                                   | 9122    |
| 6   | Anencephaly.mp. or exp ANENCEPHALY/                                                                                                                                                                                                                                                 | 3875    |
| 7   | Conjoined Twins.mp. or exp Twins, Conjoined/                                                                                                                                                                                                                                        | 2022    |
| 8   | exp Heart Defects, Congenital/ or Congenital Heart Defect*.mp.                                                                                                                                                                                                                      | 142854  |
| 9   | Anorectal Malformation*.mp.                                                                                                                                                                                                                                                         | 1896    |
| 10  | Anal Stenosis.mp.                                                                                                                                                                                                                                                                   | 389     |
| 11  | Anal Atresia.mp. or exp Anus, Imperforate/                                                                                                                                                                                                                                          | 2815    |
| 12  | Imperforate Anus.mp. or exp Anus, Imperforate/                                                                                                                                                                                                                                      | 2992    |
| 13  | Biliary atresia.mp. or exp Biliary Atresia/                                                                                                                                                                                                                                         | 4482    |
| 14  | exp Choledochal Cyst/ or Choledochal Cyst*.mp.                                                                                                                                                                                                                                      | 2825    |
| 15  | exp Diaphragmatic Eventration/ or Diaphragmatic Eventration*.mp.                                                                                                                                                                                                                    | 943     |
| 16  | Esophageal Atresia.mp. or exp Esophageal Atresia/                                                                                                                                                                                                                                   | 4173    |
| 17  | exp Tracheoesophageal Fistula/ or Tracheo-?esophageal fistula*.mp.                                                                                                                                                                                                                  | 3676    |
| 18  | Intestinal Atresia.mp. or exp Intestinal Atresia/                                                                                                                                                                                                                                   | 2301    |
| 19  | Duodenal atresia.mp.                                                                                                                                                                                                                                                                | 839     |
| 20  | Colonic Atresia.mp.                                                                                                                                                                                                                                                                 | 152     |
| 21  | Malrotation.mp.                                                                                                                                                                                                                                                                     | 2393    |
| 22  | Apple peel syndrome.mp.                                                                                                                                                                                                                                                             | 16      |
| 23  | exp Hernias, Diaphragmatic, Congenital/ or congenital diaphragmatic hernia*.mp.                                                                                                                                                                                                     | 5530    |
| 24  | Gastroschisis.mp. or exp GASTROSCHISIS/                                                                                                                                                                                                                                             | 2313    |
| 25  | Abdominal Wall Defect*.mp.                                                                                                                                                                                                                                                          | 2009    |
| 26  | Exomphalos.mp. or exp Hernia, Umbilical/                                                                                                                                                                                                                                            | 3740    |
| 27  | Omphalocele.mp. or exp Hernia, Umbilical/                                                                                                                                                                                                                                           | 4242    |
| 28  | Congenital Limb Deformities.mp. or exp Limb Deformities, Congenital/                                                                                                                                                                                                                | 22483   |
| 29  | exp Neural Tube Defects/ or Neural Tube Defect*.mp.                                                                                                                                                                                                                                 | 29051   |
| 30  | exp Bronchogenic Cyst/ or Bronchogenic Cyst*.mp.                                                                                                                                                                                                                                    | 1810    |
| 31  | exp Bronchopulmonary Sequestration/ or Bronchopulmonary sequestration*.mp.                                                                                                                                                                                                          | 2022    |
| 32  | exp "Cystic Adenomatoid Malformation of Lung, Congenital"/ or Congenital Cystic adenomatoid malformation of lung*.mp.                                                                                                                                                               | 874     |
| 33  | Renal Anomal*.mp.                                                                                                                                                                                                                                                                   | 1185    |
| 34  | exp Urogenital Abnormalities/ or Genito-urinary Anomalies.mp.                                                                                                                                                                                                                       | 57735   |
| 35  | exp Maxillofacial Abnormalities/ or Maxillofacial Abnormalit*.mp.                                                                                                                                                                                                                   | 28265   |
| 36  | exp Mouth Abnormalities/ or Mouth Abnormalit*.mp.                                                                                                                                                                                                                                   | 24459   |
| 37  | Umbilical Hernia.mp. or exp Hernia, Umbilical/                                                                                                                                                                                                                                      | 4200    |
| 38  | Hirschsprung disease.mp. or exp Hirschsprung Disease/                                                                                                                                                                                                                               | 4567    |
| 39  | exp Megacolon/ or Ganglionic Megacolon.mp.                                                                                                                                                                                                                                          | 7053    |
| 40  | Rectosigmoid aganglionosis.mp.                                                                                                                                                                                                                                                      | 15      |
| 41  | Colonic Aganglionosis.mp.                                                                                                                                                                                                                                                           | 311     |
| 42  | Intestinal Aganglionosis.mp.                                                                                                                                                                                                                                                        | 190     |
| 43  | Volvulus.mp. or exp Intestinal Volvulus/                                                                                                                                                                                                                                            | 8927    |
| 44  | LMICs.mp.                                                                                                                                                                                                                                                                           | 2001    |
| 45  | (low- and middle-income countr*).mp. [mp=title, abstract, original title, name of substance word, subject heading word, floating sub-heading word, keyword heading word, protocol supplementary concept word, rare disease supplementary concept word, unique identifier, synonyms] | 10910   |
| 46  | Low-resource setting*.mp.                                                                                                                                                                                                                                                           | 2719    |

|     |                                                                                                                                                                                                                                                                             |        |
|-----|-----------------------------------------------------------------------------------------------------------------------------------------------------------------------------------------------------------------------------------------------------------------------------|--------|
| 47  | Underdeveloped Countries.mp.                                                                                                                                                                                                                                                | 817    |
| 48  | low-income countries.mp.                                                                                                                                                                                                                                                    | 4707   |
| 49  | exp Developing Countries/ or Developing countr*.mp.                                                                                                                                                                                                                         | 115302 |
| 50  | middle-income countries.mp.                                                                                                                                                                                                                                                 | 11136  |
| 51  | limited resource setting*.mp.                                                                                                                                                                                                                                               | 253    |
| 52  | Africa South of the Sahara.mp. or exp "Africa South of the Sahara"/                                                                                                                                                                                                         | 184102 |
| 53  | Sub-Saharan Africa.mp. or exp "Africa South of the Sahara"/                                                                                                                                                                                                                 | 190396 |
| 54  | Less Resourced communities.mp.                                                                                                                                                                                                                                              | 1      |
| 55  | Afghanistan.mp. or exp AFGHANISTAN/                                                                                                                                                                                                                                         | 6065   |
| 56  | Albania.mp. or exp ALBANIA/                                                                                                                                                                                                                                                 | 1182   |
| 57  | Algeria.mp. or exp ALGERIA/                                                                                                                                                                                                                                                 | 3621   |
| 58  | American Samoa.mp.                                                                                                                                                                                                                                                          | 354    |
| 59  | Angola.mp. or exp ANGOLA/                                                                                                                                                                                                                                                   | 1403   |
| 60  | Argentina.mp. or exp ARGENTINA/                                                                                                                                                                                                                                             | 19610  |
| 61  | Armenia.mp. or exp ARMENIA/                                                                                                                                                                                                                                                 | 1676   |
| 62  | Azerbaijan.mp. or exp AZERBAIJAN/                                                                                                                                                                                                                                           | 1765   |
| 63  | Bangladesh.mp. or exp BANGLADESH/                                                                                                                                                                                                                                           | 12907  |
| 64  | Belarus.mp. or exp "Republic of Belarus"/                                                                                                                                                                                                                                   | 2553   |
| 65  | Belize.mp. or exp BELIZE/                                                                                                                                                                                                                                                   | 868    |
| 66  | Benin.mp. or exp BENIN/                                                                                                                                                                                                                                                     | 3441   |
| 67  | exp BHUTAN/ or Bhutan.mp.                                                                                                                                                                                                                                                   | 628    |
| 68  | Bolivia.mp. or exp BOLIVIA/                                                                                                                                                                                                                                                 | 3594   |
| 69  | (Bosnia and Herzegovina).mp. [mp=title, abstract, original title, name of substance word, subject heading word, floating sub-heading word, keyword heading word, protocol supplementary concept word, rare disease supplementary concept word, unique identifier, synonyms] | 2477   |
| 70  | Botswana.mp. or exp BOTSWANA/                                                                                                                                                                                                                                               | 2247   |
| 71  | Brazil.mp. or exp BRAZIL/                                                                                                                                                                                                                                                   | 101919 |
| 72  | Bulgaria.mp. or exp BULGARIA/                                                                                                                                                                                                                                               | 7554   |
| 73  | Burkina Faso.mp. or exp Burkina Faso/                                                                                                                                                                                                                                       | 3904   |
| 74  | Burundi.mp. or exp BURUNDI/                                                                                                                                                                                                                                                 | 871    |
| 75  | Cabo Verde.mp. or exp Cabo Verde/                                                                                                                                                                                                                                           | 211    |
| 76  | Cambodia.mp. or exp CAMBODIA/                                                                                                                                                                                                                                               | 4102   |
| 77  | Cameroon.mp. or exp CAMEROON/                                                                                                                                                                                                                                               | 6804   |
| 78  | Central African Republic.mp. or exp Central African Republic/                                                                                                                                                                                                               | 1096   |
| 79  | Chad.mp. or exp CHAD/                                                                                                                                                                                                                                                       | 1144   |
| 80  | China.mp. or exp CHINA/                                                                                                                                                                                                                                                     | 205799 |
| 81  | Colombia.mp. or exp COLOMBIA/                                                                                                                                                                                                                                               | 12533  |
| 82  | Comoros.mp. or exp COMOROS/                                                                                                                                                                                                                                                 | 427    |
| 83  | Democratic Republic of the Congo.mp. or exp "Democratic Republic of the Congo"/                                                                                                                                                                                             | 4506   |
| 84  | exp "Democratic Republic of the Congo" or DRC.mp.                                                                                                                                                                                                                           | 4827   |
| 85  | Republic of the Congo.mp. or exp Congo/                                                                                                                                                                                                                                     | 6176   |
| 86  | Costa Rica.mp. or exp Costa Rica/                                                                                                                                                                                                                                           | 5088   |
| 87  | Cote d'Ivoire.mp. or exp Cote d'Ivoire/                                                                                                                                                                                                                                     | 3527   |
| 88  | Ivory Coast.mp. or exp Cote d'Ivoire/                                                                                                                                                                                                                                       | 3432   |
| 89  | Croatia.mp. or exp CROATIA/                                                                                                                                                                                                                                                 | 8261   |
| 90  | Cuba.mp. or exp CUBA/                                                                                                                                                                                                                                                       | 6343   |
| 91  | Djibouti.mp. or exp DJIBOUTI/                                                                                                                                                                                                                                               | 372    |
| 92  | Dominica.mp. or exp DOMINICA/                                                                                                                                                                                                                                               | 430    |
| 93  | Dominican Republic.mp. or exp Dominican Republic/                                                                                                                                                                                                                           | 2128   |
| 94  | Ecuador.mp. or exp ECUADOR/                                                                                                                                                                                                                                                 | 4722   |
| 95  | exp EGYPT/ or Egypt.mp.                                                                                                                                                                                                                                                     | 18702  |
| 96  | El Salvador.mp. or exp El Salvador/                                                                                                                                                                                                                                         | 1319   |
| 97  | Equatorial Guinea.mp. or exp Equatorial Guinea/                                                                                                                                                                                                                             | 419    |
| 98  | Eritrea.mp. or exp ERITREA/                                                                                                                                                                                                                                                 | 518    |
| 99  | Ethiopia.mp. or exp ETHIOPIA/                                                                                                                                                                                                                                               | 13354  |
| 100 | Fiji.mp. or exp FIJI/                                                                                                                                                                                                                                                       | 1620   |
| 101 | Gabon.mp. or exp GABON/                                                                                                                                                                                                                                                     | 1925   |
| 102 | exp GAMBIA/ or Gambia.mp.                                                                                                                                                                                                                                                   | 2958   |
| 103 | exp "GEORGIA (REPUBLIC)" or exp GEORGIA/ or Georgia.mp.                                                                                                                                                                                                                     | 15842  |
| 104 | Ghana.mp. or exp GHANA/                                                                                                                                                                                                                                                     | 9432   |
| 105 | Grenada.mp. or exp GRENADA/                                                                                                                                                                                                                                                 | 308    |
| 106 | Guatemala.mp. or exp GUATEMALA/                                                                                                                                                                                                                                             | 3907   |
| 107 | Guinea.mp. or exp GUINEA-BISSAU/ or exp EQUATORIAL GUINEA/ or exp GUINEA/ or exp PAPUA NEW GUINEA/ or exp NEW GUINEA/                                                                                                                                                       | 160074 |
| 108 | Guyana.mp. or exp GUYANA/                                                                                                                                                                                                                                                   | 1136   |
| 109 | Haiti.mp. or exp HAITI/                                                                                                                                                                                                                                                     | 3707   |
| 110 | Honduras.mp. or exp HONDURAS/                                                                                                                                                                                                                                               | 1736   |

|     |                                                                                                                                                                                                                                                                                       |        |
|-----|---------------------------------------------------------------------------------------------------------------------------------------------------------------------------------------------------------------------------------------------------------------------------------------|--------|
| 111 | India.mp. or exp INDIA/                                                                                                                                                                                                                                                               | 129215 |
| 112 | Indonesia.mp. or exp INDONESIA/                                                                                                                                                                                                                                                       | 13107  |
| 113 | exp Iran/ or Islamic Republic of Iran.mp.                                                                                                                                                                                                                                             | 21280  |
| 114 | exp IRAQ/ or Iraq.mp.                                                                                                                                                                                                                                                                 | 9035   |
| 115 | Jamaica.mp. or exp JAMAICA/                                                                                                                                                                                                                                                           | 4427   |
| 116 | Jordan.mp. or exp JORDAN/                                                                                                                                                                                                                                                             | 6040   |
| 117 | Kazakhstan.mp. or exp KAZAKHSTAN/                                                                                                                                                                                                                                                     | 3153   |
| 118 | Kenya.mp. or exp KENYA/                                                                                                                                                                                                                                                               | 18798  |
| 119 | Kiribati.mp. or exp Micronesia/                                                                                                                                                                                                                                                       | 1934   |
| 120 | Democratic People's Republic of Korea.mp. or exp "Democratic People's Republic of Korea"/                                                                                                                                                                                             | 246    |
| 121 | Kosovo.mp. or exp KOSOVO/                                                                                                                                                                                                                                                             | 840    |
| 122 | Kyrgyz Republic.mp. or exp Kyrgyzstan/                                                                                                                                                                                                                                                | 1225   |
| 123 | exp Laos/ or Lao PDR.mp.                                                                                                                                                                                                                                                              | 1876   |
| 124 | Laos.mp. or exp LAOS/                                                                                                                                                                                                                                                                 | 2431   |
| 125 | Lebanon.mp. or exp LEBANON/                                                                                                                                                                                                                                                           | 5011   |
| 126 | Lesotho.mp. or exp LESOTHO/                                                                                                                                                                                                                                                           | 645    |
| 127 | Liberia.mp. or exp LIBERIA/                                                                                                                                                                                                                                                           | 1667   |
| 128 | Libya.mp. or exp LIBYA/                                                                                                                                                                                                                                                               | 1554   |
| 129 | Macedonia Republic.mp. or exp "Macedonia (Republic)"/                                                                                                                                                                                                                                 | 475    |
| 130 | Madagascar.mp. or exp MADAGASCAR/                                                                                                                                                                                                                                                     | 4734   |
| 131 | Malawi.mp. or exp MALAWI/                                                                                                                                                                                                                                                             | 6317   |
| 132 | Malaysia.mp. or exp MALAYSIA/                                                                                                                                                                                                                                                         | 18390  |
| 133 | Maldives.mp. or exp Indian Ocean Islands/                                                                                                                                                                                                                                             | 10595  |
| 134 | Mali.mp. or exp MALI/                                                                                                                                                                                                                                                                 | 3511   |
| 135 | Marshall Islands.mp. or exp Micronesia/                                                                                                                                                                                                                                               | 1959   |
| 136 | Mauritania.mp. or exp MAURITANIA/                                                                                                                                                                                                                                                     | 626    |
| 137 | Mauritius.mp. or exp MAURITIUS/                                                                                                                                                                                                                                                       | 953    |
| 138 | exp MEXICO/ or Mexico.mp.                                                                                                                                                                                                                                                             | 53282  |
| 139 | Micronesia.mp. or exp MICRONESIA/                                                                                                                                                                                                                                                     | 2243   |
| 140 | Moldova.mp. or exp MOLDOVA/                                                                                                                                                                                                                                                           | 920    |
| 141 | Mongolia.mp. or exp MONGOLIA/                                                                                                                                                                                                                                                         | 3809   |
| 142 | Montenegro.mp. or exp MONTENEGRO/                                                                                                                                                                                                                                                     | 749    |
| 143 | Morocco.mp. or exp MOROCCO/                                                                                                                                                                                                                                                           | 6855   |
| 144 | Mozambique.mp. or exp MOZAMBIQUE/                                                                                                                                                                                                                                                     | 3236   |
| 145 | Myanmar.mp. or exp MYANMAR/                                                                                                                                                                                                                                                           | 3198   |
| 146 | Namibia.mp. or exp NAMIBIA                                                                                                                                                                                                                                                            | 1502   |
| 147 | Nauru.mp. or exp Micronesia/                                                                                                                                                                                                                                                          | 1921   |
| 148 | Nepal.mp. or exp NEPAL/                                                                                                                                                                                                                                                               | 9337   |
| 149 | Nicaragua.mp. or exp NICARAGUA/                                                                                                                                                                                                                                                       | 1949   |
| 150 | exp NIGER/ or Niger.mp.                                                                                                                                                                                                                                                               | 12299  |
| 151 | Nigeria.mp. or exp NIGERIA/                                                                                                                                                                                                                                                           | 32627  |
| 152 | Pakistan.mp. or exp PAKISTAN/                                                                                                                                                                                                                                                         | 20153  |
| 153 | exp PANAMA/ or Panama.mp.                                                                                                                                                                                                                                                             | 4265   |
| 154 | Papua New Guinea.mp. or exp Papua New Guinea/                                                                                                                                                                                                                                         | 5003   |
| 155 | Paraguay.mp. or exp PARAGUAY/                                                                                                                                                                                                                                                         | 1433   |
| 156 | Peru.mp. or exp PERU/                                                                                                                                                                                                                                                                 | 11249  |
| 157 | Philippines.mp. or exp PHILIPPINES/                                                                                                                                                                                                                                                   | 10698  |
| 158 | Romania.mp. or exp ROMANIA/                                                                                                                                                                                                                                                           | 11521  |
| 159 | exp Russia/ or Russian Federation.mp.                                                                                                                                                                                                                                                 | 51376  |
| 160 | Rwanda.mp. or exp RWANDA/                                                                                                                                                                                                                                                             | 2883   |
| 161 | exp AMERICAN SAMOA/ or Samoa.mp. or exp SAMOA/ or exp "INDEPENDENT STATE OF SAMOA"/                                                                                                                                                                                                   | 1024   |
| 162 | (Sao Tome and Principe).mp. [mp=title, abstract, original title, name of substance word, subject heading word, floating sub-heading word, keyword heading word, protocol supplementary concept word, rare disease supplementary concept word, unique identifier, synonyms]            | 135    |
| 163 | Senegal.mp. or exp SENEGAL/                                                                                                                                                                                                                                                           | 7067   |
| 164 | Serbia.mp. or exp SERBIA/                                                                                                                                                                                                                                                             | 4574   |
| 165 | Sierra Leone.mp. or exp Sierra Leone/                                                                                                                                                                                                                                                 | 2103   |
| 166 | Solomon Islands.mp. or exp Melanesia/                                                                                                                                                                                                                                                 | 6193   |
| 167 | Somalia.mp. or exp SOMALIA/                                                                                                                                                                                                                                                           | 1968   |
| 168 | Somaliland.mp.                                                                                                                                                                                                                                                                        | 136    |
| 169 | South Africa.mp. or exp South Africa/                                                                                                                                                                                                                                                 | 47075  |
| 170 | South Sudan.mp. or exp South Sudan/                                                                                                                                                                                                                                                   | 397    |
| 171 | Sri Lanka.mp. or exp Sri Lanka/                                                                                                                                                                                                                                                       | 7342   |
| 172 | Saint Lucia.mp. or exp Saint Lucia/                                                                                                                                                                                                                                                   | 114    |
| 173 | (Saint Vincent and the Grenadines).mp. [mp=title, abstract, original title, name of substance word, subject heading word, floating sub-heading word, keyword heading word, protocol supplementary concept word, rare disease supplementary concept word, unique identifier, synonyms] | 57     |

|     |                                                                                                                                                                                                                                                                                                                                                                                                                                                                                                                                                                                                                                                                                                                                                                                                                                                                                                                                                                                                                                                                                    |         |
|-----|------------------------------------------------------------------------------------------------------------------------------------------------------------------------------------------------------------------------------------------------------------------------------------------------------------------------------------------------------------------------------------------------------------------------------------------------------------------------------------------------------------------------------------------------------------------------------------------------------------------------------------------------------------------------------------------------------------------------------------------------------------------------------------------------------------------------------------------------------------------------------------------------------------------------------------------------------------------------------------------------------------------------------------------------------------------------------------|---------|
| 174 | exp SUDAN/ or Sudan.mp.                                                                                                                                                                                                                                                                                                                                                                                                                                                                                                                                                                                                                                                                                                                                                                                                                                                                                                                                                                                                                                                            | 8429    |
| 175 | Suriname.mp. or exp SURINAME/                                                                                                                                                                                                                                                                                                                                                                                                                                                                                                                                                                                                                                                                                                                                                                                                                                                                                                                                                                                                                                                      | 1098    |
| 176 | Swaziland.mp. or exp SWAZILAND/                                                                                                                                                                                                                                                                                                                                                                                                                                                                                                                                                                                                                                                                                                                                                                                                                                                                                                                                                                                                                                                    | 818     |
| 177 | Syrian Arab Republic.mp.                                                                                                                                                                                                                                                                                                                                                                                                                                                                                                                                                                                                                                                                                                                                                                                                                                                                                                                                                                                                                                                           | 73      |
| 178 | Syria.mp. or exp SYRIA/                                                                                                                                                                                                                                                                                                                                                                                                                                                                                                                                                                                                                                                                                                                                                                                                                                                                                                                                                                                                                                                            | 2407    |
| 179 | Tajikistan.mp. or exp TAJIKISTAN/                                                                                                                                                                                                                                                                                                                                                                                                                                                                                                                                                                                                                                                                                                                                                                                                                                                                                                                                                                                                                                                  | 910     |
| 180 | Tanzania.mp. or exp TANZANIA/                                                                                                                                                                                                                                                                                                                                                                                                                                                                                                                                                                                                                                                                                                                                                                                                                                                                                                                                                                                                                                                      | 12921   |
| 181 | Thailand.mp. or exp THAILAND/                                                                                                                                                                                                                                                                                                                                                                                                                                                                                                                                                                                                                                                                                                                                                                                                                                                                                                                                                                                                                                                      | 32186   |
| 182 | exp Timor-Leste/ or Timor-Leste.mp.                                                                                                                                                                                                                                                                                                                                                                                                                                                                                                                                                                                                                                                                                                                                                                                                                                                                                                                                                                                                                                                | 311     |
| 183 | East Timor.mp.                                                                                                                                                                                                                                                                                                                                                                                                                                                                                                                                                                                                                                                                                                                                                                                                                                                                                                                                                                                                                                                                     | 187     |
| 184 | Togo.mp. or exp TOGO/                                                                                                                                                                                                                                                                                                                                                                                                                                                                                                                                                                                                                                                                                                                                                                                                                                                                                                                                                                                                                                                              | 1491    |
| 185 | Tonga.mp. or exp TONGA/                                                                                                                                                                                                                                                                                                                                                                                                                                                                                                                                                                                                                                                                                                                                                                                                                                                                                                                                                                                                                                                            | 463     |
| 186 | Tunisia.mp. or exp TUNISIA/                                                                                                                                                                                                                                                                                                                                                                                                                                                                                                                                                                                                                                                                                                                                                                                                                                                                                                                                                                                                                                                        | 9057    |
| 187 | exp TURKEY/ or Turkey.mp.                                                                                                                                                                                                                                                                                                                                                                                                                                                                                                                                                                                                                                                                                                                                                                                                                                                                                                                                                                                                                                                          | 46898   |
| 188 | Turkmenistan.mp. or exp TURKMENISTAN/                                                                                                                                                                                                                                                                                                                                                                                                                                                                                                                                                                                                                                                                                                                                                                                                                                                                                                                                                                                                                                              | 717     |
| 189 | Tuvalu.mp. or exp Micronesia/                                                                                                                                                                                                                                                                                                                                                                                                                                                                                                                                                                                                                                                                                                                                                                                                                                                                                                                                                                                                                                                      | 1884    |
| 190 | Uganda.mp. or exp UGANDA/                                                                                                                                                                                                                                                                                                                                                                                                                                                                                                                                                                                                                                                                                                                                                                                                                                                                                                                                                                                                                                                          | 13956   |
| 191 | Ukraine.mp. or exp UKRAINE/                                                                                                                                                                                                                                                                                                                                                                                                                                                                                                                                                                                                                                                                                                                                                                                                                                                                                                                                                                                                                                                        | 16702   |
| 192 | Uzbekistan.mp. or exp UZBEKISTAN/                                                                                                                                                                                                                                                                                                                                                                                                                                                                                                                                                                                                                                                                                                                                                                                                                                                                                                                                                                                                                                                  | 2161    |
| 193 | Vanuatu.mp. or exp VANUATU/                                                                                                                                                                                                                                                                                                                                                                                                                                                                                                                                                                                                                                                                                                                                                                                                                                                                                                                                                                                                                                                        | 629     |
| 194 | Venezuela.mp. or exp VENEZUELA/                                                                                                                                                                                                                                                                                                                                                                                                                                                                                                                                                                                                                                                                                                                                                                                                                                                                                                                                                                                                                                                    | 6620    |
| 195 | exp VIETNAM/ or Vietnam.mp.                                                                                                                                                                                                                                                                                                                                                                                                                                                                                                                                                                                                                                                                                                                                                                                                                                                                                                                                                                                                                                                        | 15919   |
| 196 | (West Bank and Gaza).mp. [mp=title, abstract, original title, name of substance word, subject heading word, floating sub-heading word, keyword heading word, protocol supplementary concept word, rare disease supplementary concept word, unique identifier, synonyms]                                                                                                                                                                                                                                                                                                                                                                                                                                                                                                                                                                                                                                                                                                                                                                                                            | 194     |
| 197 | Republic of Yemen.mp. or exp Yemen/                                                                                                                                                                                                                                                                                                                                                                                                                                                                                                                                                                                                                                                                                                                                                                                                                                                                                                                                                                                                                                                | 1264    |
| 198 | Zambia.mp. or exp ZAMBIA/                                                                                                                                                                                                                                                                                                                                                                                                                                                                                                                                                                                                                                                                                                                                                                                                                                                                                                                                                                                                                                                          | 5404    |
| 199 | Zimbabwe.mp. or exp ZIMBABWE/                                                                                                                                                                                                                                                                                                                                                                                                                                                                                                                                                                                                                                                                                                                                                                                                                                                                                                                                                                                                                                                      | 6879    |
| 200 | Antenatal Diagnosis.mp.                                                                                                                                                                                                                                                                                                                                                                                                                                                                                                                                                                                                                                                                                                                                                                                                                                                                                                                                                                                                                                                            | 2383    |
| 201 | Prenatal Diagnosis.mp. or exp Prenatal Diagnosis/                                                                                                                                                                                                                                                                                                                                                                                                                                                                                                                                                                                                                                                                                                                                                                                                                                                                                                                                                                                                                                  | 74636   |
| 202 | Antenatal Screening.mp.                                                                                                                                                                                                                                                                                                                                                                                                                                                                                                                                                                                                                                                                                                                                                                                                                                                                                                                                                                                                                                                            | 1193    |
| 203 | Prenatal Screening.mp.                                                                                                                                                                                                                                                                                                                                                                                                                                                                                                                                                                                                                                                                                                                                                                                                                                                                                                                                                                                                                                                             | 2579    |
| 204 | Antenatal Ultrasound.mp.                                                                                                                                                                                                                                                                                                                                                                                                                                                                                                                                                                                                                                                                                                                                                                                                                                                                                                                                                                                                                                                           | 702     |
| 205 | Prenatal Ultrasound.mp.                                                                                                                                                                                                                                                                                                                                                                                                                                                                                                                                                                                                                                                                                                                                                                                                                                                                                                                                                                                                                                                            | 2203    |
| 206 | Antenatal Ultrasonography.mp.                                                                                                                                                                                                                                                                                                                                                                                                                                                                                                                                                                                                                                                                                                                                                                                                                                                                                                                                                                                                                                                      | 200     |
| 207 | Prenatal Ultrasonography.mp. or exp Ultrasonography, Prenatal/                                                                                                                                                                                                                                                                                                                                                                                                                                                                                                                                                                                                                                                                                                                                                                                                                                                                                                                                                                                                                     | 30427   |
| 208 | 1 or 2 or 3 or 4 or 5 or 6 or 7 or 8 or 9 or 10 or 11 or 12 or 13 or 14 or 15 or 16 or 17 or 18 or 19 or 20 or 21 or 22 or 23 or 24 or 25 or 26 or 27 or 28 or 29 or 30 or 31 or 32 or 33 or 34 or 35 or 36 or 37 or 38 or 39 or 40 or 41 or 42 or 43                                                                                                                                                                                                                                                                                                                                                                                                                                                                                                                                                                                                                                                                                                                                                                                                                              | 607001  |
| 209 | 44 or 45 or 46 or 47 or 48 or 49 or 50 or 51 or 52 or 53 or 54 or 55 or 56 or 57 or 58 or 59 or 60 or 61 or 62 or 63 or 64 or 65 or 66 or 67 or 68 or 69 or 70 or 71 or 72 or 73 or 74 or 75 or 76 or 77 or 78 or 79 or 80 or 81 or 82 or 83 or 84 or 85 or 86 or 87 or 88 or 89 or 90 or 91 or 92 or 93 or 94 or 95 or 96 or 97 or 98 or 99 or 100 or 101 or 102 or 103 or 104 or 105 or 106 or 107 or 108 or 109 or 110 or 111 or 112 or 113 or 114 or 115 or 116 or 117 or 118 or 119 or 120 or 121 or 122 or 123 or 124 or 125 or 126 or 127 or 128 or 129 or 130 or 131 or 132 or 133 or 134 or 135 or 136 or 137 or 138 or 139 or 140 or 141 or 142 or 143 or 144 or 145 or 146 or 147 or 148 or 149 or 150 or 151 or 152 or 153 or 154 or 155 or 156 or 157 or 158 or 159 or 160 or 161 or 162 or 163 or 164 or 165 or 166 or 167 or 168 or 169 or 170 or 171 or 172 or 173 or 174 or 175 or 176 or 177 or 178 or 179 or 180 or 181 or 182 or 183 or 184 or 185 or 186 or 187 or 188 or 189 or 190 or 191 or 192 or 193 or 194 or 195 or 196 or 197 or 198 or 199 (1385344) | 1385344 |
| 210 | 200 or 201 or 202 or 203 or 204 or 205 or 206 or 207                                                                                                                                                                                                                                                                                                                                                                                                                                                                                                                                                                                                                                                                                                                                                                                                                                                                                                                                                                                                                               | 77525   |
| 211 | 208 and 209 and 210                                                                                                                                                                                                                                                                                                                                                                                                                                                                                                                                                                                                                                                                                                                                                                                                                                                                                                                                                                                                                                                                | 896     |
